# Supplementary material for: International Trade as a Double-Edged Sword: The Perspective of Carbon Emissions
Source: Frontiers journal article supplement (doi:10.3389/fenrg.2021.764914), 2021-10-26
Supplement: Data_Sheet_1.xlsx [file Data_Sheet_1.xlsx]

## Sheet: Sheet1
id	year	name	industry	fddi	carbon	fdi	people	fuelcarbon	gdp	gdpper	export	import	urban	lncarbon	lnfuelcarbon	pgdp	lnexport	trade	open	lnfdi	lngdp	llncarbon	lnpeople	_est_fe	_est_re	defi	ggdp	carr	lncarr	gggdp	dera	fura	lopen	noecd	gdpdeflator	_cat	expr	impr
1	1996	AUS	26.05	122702	320.68	28.24	2.38	296.21	400000000	21861.3	57000000	60000000	84.77	5.77044	5.69107	9.99248	17.8599	118000000	0.293543	11.7175	19.8077		0.867101	1	1	-3357776	0.400303	801.094	6.68598	400303	-8.38809	0.923693	-1.22573	0	1.0901		0.142577	0.150966
1	1997	AUS	25.29	106451	330.77	24.39	2.41	303.71	430000000	23468.6	60000000	61000000	84.64	5.80142	5.71607	10.0634	17.9045	121000000	0.277655	11.5754	19.8899	5.77044	0.879627	1	1	-1295948	0.434568	761.147	6.63483	434568	-2.98215	0.918191	-1.28137	0	1.0856	2	0.137337	0.140319
1	1998	AUS	25.44	113102	340.16	29.03	2.44	323.11	400000000	21319	52000000	60000000	84.5	5.82942	5.77799	9.96735	17.7684	112000000	0.281479	11.636	19.8042	5.80142	0.891998	1	1	-8108192	0.398899	852.747	6.74846	398899	-20.3264	0.949877	-1.2677	0	0.9179	2	0.130577	0.150903
1	1999	AUS	24.7	127144	356.81	29.81	2.46	329.33	390000000	20533	52000000	64000000	84.37	5.8772	5.79706	9.92979	17.7622	116000000	0.299138	11.7531	19.7781	5.82942	0.900161	1	1	-12700000	0.388608	918.174	6.82239	388608	-32.7238	0.922984	-1.20685	0	0.9742	2	0.133207	0.165931
1	2000	AUS	24.64	121686	358.24	29.77	2.49	335.35	420000000	21679.3	60000000	71000000	84.24	5.8812	5.81517	9.98411	17.9152	132000000	0.316922	11.7092	19.8443	5.8772	0.912283	1	1	-11000000	0.415223	862.766	6.76014	415223	-26.3785	0.936104	-1.1491	0	1.0685	2	0.145272	0.17165
1	2001	AUS	23.68	123671	360.5	31.7	2.53	341.93	380000000	19490.9	60000000	64000000	84.1	5.88749	5.83461	9.8777	17.9051	124000000	0.327094	11.7254	19.7514	5.8812	0.928219	1	1	-4337688	0.378376	952.756	6.85936	378376	-11.464	0.948488	-1.11751	0	0.9113	2	0.157815	0.169279
1	2002	AUS	23.63	154275	365.39	35.45	2.56	346.54	390000000	20082.5	61000000	72000000	84.22	5.90097	5.848	9.9076	17.9262	133000000	0.338164	11.9465	19.7935	5.88749	0.940007	1	1	-11500000	0.394649	925.861	6.83072	394649	-29.0911	0.948411	-1.08422	0	1.043	2	0.154537	0.183628
1	2003	AUS	24.06	219094	372.18	39.23	2.59	353.7	470000000	23447	64000000	89000000	84.34	5.91938	5.86845	10.0625	17.9811	153000000	0.32807	12.2973	19.9607	5.90097	0.951658	1	1	-24200000	0.466488	797.834	6.6819	466488	-51.8308	0.950347	-1.11453	0	1.182	2	0.13812	0.18995
1	2004	AUS	23.95	291010	385.8	42.9	2.62	368.16	610000000	30430.7	80000000	110000000	84.46	5.95532	5.90852	10.3232	18.2013	189000000	0.309089	12.5811	20.233	5.91938	0.963174	1	1	-28700000	0.61249	629.887	6.44554	612490	-46.8786	0.954277	-1.17413	0	1.313	2	0.131105	0.177984
1	2005	AUS	24.62	247748	383.11	32.56	2.65	371.92	690000000	33999.2	99000000	120000000	84.58	5.94832	5.91868	10.4341	18.4094	224000000	0.322544	12.4202	20.3571	5.95532	0.97456	1	1	-25900000	0.693408	552.503	6.31446	693408	-37.3448	0.970792	-1.13152	0	1.1321	2	0.142599	0.179944
1	2006	AUS	25.61	302079	404.95	36.92	2.69	376.27	750000000	36044.9	110000000	140000000	84.7	6.00376	5.93031	10.4925	18.5579	254000000	0.339904	12.6184	20.4303	5.94832	0.989541	1	1	-24200000	0.746054	542.789	6.29672	746054	-32.3898	0.929176	-1.07909	0	1.0759	2	0.153757	0.186147
1	2007	AUS	25.65	391761	408.39	39.77	2.71	386.28	850000000	40960.1	130000000	160000000	84.82	6.01222	5.95656	10.6204	18.6978	297000000	0.347735	12.8784	20.5644	6.00376	0.996949	1	1	-32800000	0.8531	478.713	6.1711	853100	-38.4216	0.945861	-1.05631	0	1.1435	2	0.154657	0.193078
1	2008	AUS	25.59	307751	417.61	29.12	2.77	388.82	1100000000	49601.7	180000000	200000000	84.94	6.03455	5.96312	10.8118	19.0036	377000000	0.357879	12.6371	20.7758	6.01222	1.01885	1	1	-19000000	1.054	396.216	5.98196	1053996	-17.9816	0.93106	-1.02756	0	1.2355	2	0.169949	0.187931
1	2009	AUS	27	439387	410.46	43.32	2.82	394.48	930000000	42772.4	150000000	160000000	85.06	6.01728	5.97757	10.6637	18.8019	307000000	0.331119	12.9931	20.6483	6.03455	1.03674	1	1	-14400000	0.927805	442.399	6.09221	927805	-15.5148	0.961068	-1.10528	0	0.8803	2	0.157802	0.173317
1	2010	AUS	25.15	527064	402.63	40.61	2.87	385.05	1100000000	52022.1	200000000	200000000	85.18	5.99802	5.95337	10.8594	19.1233	398000000	0.347181	13.1751	20.8597	6.01728	1.05431	1	1	5879920	1.14614	351.293	5.86162	1146139	5.1302	0.956337	-1.05791	0	1.2353	2	0.176156	0.171026
1	2011	AUS	26.44	555575	409.68	35.92	2.91	385.49	1400000000	62517.8	260000000	230000000	85.3	6.01538	5.95451	11.0432	19.3711	486000000	0.34771	13.2278	21.0573	5.99802	1.06815	1	1	31700000	1.39665	293.33	5.6813	1396650	22.7087	0.940954	-1.05639	0	1.2186	2	0.185209	0.1625
1	2012	AUS	26.28	615814	402.59	38.71	2.96	386.97	1500000000	68012.1	250000000	240000000	85.4	5.99792	5.95835	11.1274	19.3227	491000000	0.317607	13.3307	21.159	6.01538	1.08519	1	1	1851536	1.54615	260.382	5.56215	1546152	1.19751	0.961201	-1.14694	0	1.107	2	0.159402	0.158205
1	2013	AUS	25.13	569825	398.95	36.92	3.01	388.68	1600000000	68150.1	240000000	230000000	85.5	5.98884	5.96276	11.1295	19.3107	471000000	0.298954	13.2531	21.1783	5.99792	1.10194	1	1	15800000	1.57618	253.111	5.53383	1576185	10.0293	0.974257	-1.20747	0	1.0194	2	0.154492	0.144462
1	2014	AUS	25.51	582535	405.73	39.78	3.06	373.78	1500000000	62510.8	230000000	220000000	85.6	6.00569	5.92367	11.0431	19.2644	454000000	0.309145	13.2752	21.1068	5.98884	1.11841	1	1	11300000	1.46748	276.48	5.62214	1467484	7.71947	0.921253	-1.17394	0	0.931	2	0.158432	0.150713
1	2015	AUS	23.64	566420	411.33	45.36	3.1	380.93	1400000000	56755.7	180000000	190000000	85.7	6.0194	5.94262	10.9465	19.0123	375000000	0.277694	13.2471	21.0246	6.00569	1.1314	1	1	-14000000	1.35169	304.307	5.71804	1351694	-10.3306	0.926093	-1.28124	0	0.9211	2	0.133682	0.144012
1	2016	AUS	22.28	611072	411.81	46.59	3.14	392.37	1200000000	49971.1	180000000	190000000	85.8	6.02056	5.9722	10.8192	19.0212	370000000	0.305873	13.323	20.9129	6.0194	1.14422	1	1	-5149392	1.20885	340.663	5.83089	1208847	-4.25976	0.952794	-1.18459	0	0.8943	2	0.150807	0.155066
1	2017	AUS	23.46	699570	409.64	49.4	3.2	384.58	1300000000	54028	200000000	210000000	85.9	6.01528	5.95215	10.8973	19.0923	409000000	0.307999	13.4582	21.0078	6.02056	1.16315	1	1	-17900000	1.32919	308.188	5.73071	1329189	-13.4843	0.938824	-1.17766	0	1.0996	2	0.147258	0.160742
1	2018	AUS	24.16	701794	411.1	48.27	3.25	382.88	1400000000	57355	210000000	230000000	86.01	6.01884	5.94772	10.957	19.1492	435000000	0.303837	13.4614	21.083	6.01528	1.17866	1	1	-20900000	1.43288	286.904	5.65915	1432881	-14.6182	0.931355	-1.19126	0	1.078	2	0.14461	0.159228
2	1996	BRA	22.34	54846	270.79	6.46	19.7	254.01	850000000	5166.16	47000000	54000000	78.3	5.60134	5.53737	8.54988	17.6599	101000000	0.118606	10.9123	20.5613		2.98062	1	1	-7404864	0.850426	318.417	5.76336	850426	-8.70724	0.938033	-2.13195	1	1.1054		0.0549493	0.0636566
2	1997	BRA	22.59	69721.5	283.85	7.91	20.01	272.23	880000000	5282.01	52000000	62000000	79.05	5.64845	5.60665	8.57206	17.7645	114000000	0.129498	11.1523	20.5991	5.60134	2.99623	1	1	-10600000	0.8832	321.388	5.77265	883200	-12.0046	0.959063	-2.04409	1	1.0385	2	0.058747	0.0707515
2	1998	BRA	22.12	99505.4	294.4	11.65	20.31	280.16	860000000	5087.15	50000000	59000000	79.78	5.68494	5.63536	8.53447	17.7309	109000000	0.126031	11.508	20.5768	5.64845	3.01111	1	1	-8522620	0.863723	340.85	5.83144	863723	-9.8673	0.951631	-2.07123	1	0.9779	2	0.0580819	0.0679492
2	1999	BRA	21.75	102331	297.39	17.23	20.62	290.44	600000000	3478.37	47000000	49000000	80.5	5.69505	5.6714	8.15432	17.6615	96300000	0.160657	11.536	20.2114	5.68494	3.02626	1	1	-2685900	0.599389	496.156	6.20689	599389	-4.48107	0.97663	-1.82848	1	0.694	1	0.0780879	0.0825689
2	2000	BRA	23.01	122250	301.71	18.65	20.91	303.58	660000000	3749.75	54000000	56000000	81.19	5.70947	5.71565	8.22945	17.8052	110000000	0.16759	11.7138	20.3008	5.69505	3.04023	1	1	-1762748	0.655421	460.33	6.13194	655421	-2.68949	1.0062	-1.78624	1	1.0935	2	0.08245	0.0851395
2	2001	BRA	22.64	117611	311.02	20.97	21.2	308.86	560000000	3156.8	57000000	56000000	81.55	5.73986	5.73289	8.05731	17.8602	113000000	0.201367	11.6751	20.1423	5.70947	3.054	1	1	1549012	0.559372	556.016	6.3208	559372	2.7692	0.993055	-1.60263	1	0.8535	1	0.102068	0.099299
2	2002	BRA	22.5	96860.9	311.1	18.92	21.48	308.67	510000000	2829.28	59000000	47000000	81.88	5.74011	5.73227	7.94778	17.8966	106000000	0.209458	11.481	20.0459	5.73986	3.06712	1	1	12000000	0.507962	612.447	6.41746	507962	23.6581	0.992189	-1.56323	1	0.9081	1	0.116558	0.0928998
2	2003	BRA	23.08	127726	308.23	22.85	21.75	302.83	560000000	3070.91	72000000	48000000	82.2	5.73085	5.71317	8.02973	18.0917	120000000	0.215334	11.7576	20.1404	5.74011	3.07961	1	1	23700000	0.55832	552.067	6.31367	558320	42.4468	0.98248	-1.53557	1	1.0991	1	0.12889	0.0864436
2	2004	BRA	24.31	157777	322.87	23.57	22.02	320.73	670000000	3637.46	95000000	63000000	82.52	5.77725	5.7706	8.19904	18.3714	158000000	0.235974	11.9689	20.3218	5.73085	3.09195	1	1	32400000	0.669317	482.387	6.17875	669317	48.4719	0.993372	-1.44403	1	1.1988	1	0.142223	0.093751
2	2005	BRA	24.17	177915	329.98	19.95	22.27	322.68	890000000	4790.44	120000000	74000000	82.83	5.79903	5.77666	8.47438	18.572	190000000	0.212936	12.0891	20.6086	5.77725	3.10324	1	1	42800000	0.89163	370.086	5.91374	891630	48.0111	0.977877	-1.54676	1	1.3321	2	0.130473	0.0824623
2	2006	BRA	23.54	213021	335.42	19.23	22.51	327.9	1100000000	5886.46	140000000	91000000	83.14	5.81538	5.79271	8.68041	18.7221	226000000	0.204431	12.2691	20.8255	5.79903	3.11396	1	1	43900000	1.10764	302.824	5.71315	1107640	39.6397	0.97758	-1.58752	1	1.2423	2	0.122036	0.0823958
2	2007	BRA	23.13	292531	349.82	20.94	22.75	342.59	1400000000	7348.03	160000000	110000000	83.45	5.85742	5.83653	8.90219	18.8676	269000000	0.1924	12.5863	21.0576	5.81538	3.12457	1	1	43900000	1.39708	250.393	5.52303	1397084	31.422	0.979332	-1.64818	1	1.2613	2	0.111911	0.0804891
2	2008	BRA	23.09	260531	373.03	15.36	22.98	347.89	1700000000	8831.02	190000000	170000000	83.75	5.92166	5.85189	9.08603	19.0788	366000000	0.21583	12.4705	21.2514	5.85742	3.13462	1	1	20200000	1.69582	219.97	5.39349	1695825	11.9201	0.932606	-1.53327	1	1.2138	2	0.113875	0.101955
2	2009	BRA	21.88	367183	350.5	22.03	23.2	324.38	1700000000	8597.92	150000000	130000000	84.04	5.85936	5.78192	9.05928	18.8274	278000000	0.166692	12.8136	21.2343	5.92166	3.14415	1	1	22500000	1.66702	210.256	5.34832	1667020	13.4989	0.925478	-1.79161	1	0.983	2	0.0900956	0.0765967
2	2010	BRA	23.27	640334	398.32	28.99	23.42	370.46	2200000000	11286.2	200000000	180000000	84.34	5.98726	5.91474	9.33134	19.1044	380000000	0.171961	13.3697	21.5158	5.85936	3.15359	1	1	16400000	2.20887	180.327	5.19477	2208872	7.42484	0.930056	-1.76049	1	1.325	2	0.089693	0.0822682
2	2011	BRA	23.1	695505	423.76	24.81	23.63	389.53	2600000000	13245.6	250000000	230000000	84.63	6.04917	5.96494	9.49142	19.3408	477000000	0.182374	13.4524	21.685	5.98726	3.16252	1	1	24800000	2.6162	161.975	5.08744	2616201	9.47538	0.919223	-1.7017	1	1.1844	2	0.0959247	0.0864493
2	2012	BRA	22.13	664208	442.86	26.94	23.84	422.17	2500000000	12370	240000000	220000000	84.92	6.09325	6.04541	9.42303	19.2833	460000000	0.18663	13.4063	21.6255	6.04917	3.17137	1	1	13800000	2.46519	179.645	5.19099	2465189	5.5997	0.953281	-1.67863	1	0.9423	2	0.0961146	0.0905149
2	2013	BRA	21.22	627789	482.87	25.39	24.05	452.39	2500000000	12300.3	240000000	240000000	85.21	6.17975	6.11454	9.41738	19.2844	477000000	0.192875	13.35	21.6286	6.09325	3.18013	1	1	-2552368	2.47281	195.272	5.27439	2472807	-1.03217	0.936878	-1.64571	1	1.0031	2	0.0959214	0.0969536
2	2014	BRA	20.47	601490	503.78	24.49	24.26	476.02	2500000000	12112.6	220000000	230000000	85.49	6.22214	6.16546	9.402	19.2105	449000000	0.183	13.3072	21.6218	6.17975	3.18883	1	1	-8850576	2.45599	205.123	5.32361	2455994	-3.60366	0.944897	-1.69827	1	0.9932	2	0.0896982	0.0933018
2	2015	BRA	19.36	429843	487.04	23.85	24.46	450.79	1800000000	8814	190000000	170000000	85.77	6.18835	6.111	9.0841	19.0526	360000000	0.199512	12.9712	21.3123	6.22214	3.19704	1	1	16700000	1.80221	270.245	5.59933	1802214	9.24975	0.925571	-1.61188	1	0.7338	2	0.104381	0.0951309
2	2016	BRA	18.35	563540	450.37	31.39	24.67	416.69	1800000000	8710.1	180000000	140000000	86.04	6.11007	6.03234	9.07224	19.0256	321000000	0.17857	13.242	21.3087	6.18835	3.20559	1	1	45600000	1.7957	250.805	5.52467	1795700	25.3696	0.925217	-1.72277	1	0.9964	2	0.10197	0.0766002
2	2017	BRA	18.18	623021	457.23	30.34	24.87	427.63	2100000000	9925.39	220000000	150000000	86.31	6.12519	6.05826	9.20285	19.1863	366000000	0.177275	13.3423	21.4474	6.11007	3.21366	1	1	64400000	2.06283	221.652	5.40111	2062831	31.2154	0.935262	-1.73005	1	1.1491	2	0.104245	0.0730299
2	2018	BRA	18.13	568741	442.25	30.44	25.06	406.25	1900000000	9001.23	240000000	180000000	86.57	6.09188	6.00697	9.10512	19.2863	419000000	0.222146	13.2512	21.3575	6.12519	3.22127	1	1	56500000	1.88548	234.555	5.45769	1885483	29.9469	0.918598	-1.50442	1	0.929	2	0.126047	0.0960998
3	1996	GERMAN	28.86	316601	914.85	2.06	234.65	896.52	2500000000	30485.9	490000000	420000000	74.13	6.81876	6.79852	10.325	20.0054	908000000	0.363564	12.6654	21.6384		5.4581	1	1	67600000	2.49724	366.344	5.90357	2497245	27.0876	0.979964	-1.0118	0	0.9658		0.195326	0.168238
3	1997	GERMAN	28.58	314306	888	3.34	235.02	865.79	2200000000	26964.1	480000000	400000000	74.34	6.78897	6.76364	10.2023	19.9904	881000000	0.3984	12.6581	21.5172	6.81876	5.45967	1	1	79800000	2.21199	401.449	5.99508	2211990	36.0738	0.974989	-0.920298	0	0.8858	2	0.217237	0.181163
3	1998	GERMAN	28.38	403622	879.04	4.73	235.08	858.93	2200000000	27289.1	520000000	440000000	74.55	6.77883	6.75569	10.2142	20.0666	959000000	0.428223	12.9082	21.5293	6.78897	5.45993	1	1	78400000	2.23899	392.605	5.97281	2238991	35.0232	0.977123	-0.848111	0	1.0122	2	0.231623	0.1966
3	1999	GERMAN	27.65	235254	855.92	9.28	235.26	826.85	2200000000	26725.9	510000000	430000000	74.76	6.75218	6.71762	10.1934	20.0517	943000000	0.42989	12.3684	21.5091	6.77883	5.46069	1	1	78600000	2.1942	390.082	5.96636	2194204	35.8233	0.966037	-0.844227	0	0.98	2	0.232856	0.197033
3	2000	GERMAN	27.71	470938	854.42	11.37	235.6	825.04	1900000000	23635.9	510000000	440000000	74.97	6.75042	6.71543	10.0705	20.0481	950000000	0.488798	13.0625	21.3876	6.75218	5.46213	1	1	68400000	1.94315	439.71	6.08612	1943146	35.1805	0.965614	-0.715805	0	0.8856	2	0.261989	0.226809
3	2001	GERMAN	27.07	424308	871.67	16.37	236.03	843.29	1900000000	23607.9	550000000	460000000	75.17	6.77041	6.73731	10.0693	20.1225	1010000000	0.521186	12.9582	21.3881	6.75042	5.46396	1	1	83600000	1.94411	448.365	6.10561	1944107	42.977	0.967442	-0.651649	0	1.0005	2	0.282081	0.239104
3	2002	GERMAN	26.38	538019	859.05	19.79	236.45	830.74	2100000000	25077.7	590000000	470000000	75.37	6.75583	6.72232	10.1297	20.2022	1070000000	0.515156	13.1957	21.4502	6.77041	5.46574	1	1	122000000	2.06862	415.276	6.02894	2068624	59.0331	0.967045	-0.663286	0	1.064	2	0.287094	0.228061
3	2003	GERMAN	26.19	686717	861.99	21.75	236.62	831.37	2500000000	30243.6	690000000	550000000	75.58	6.75924	6.72307	10.317	20.3589	1240000000	0.49804	13.4397	21.638	6.75583	5.46645	1	1	146000000	2.49613	345.331	5.8445	2496129	58.5381	0.964477	-0.697076	0	1.2067	2	0.278289	0.219751
3	2004	GERMAN	26.4	727999	847.53	20.14	236.59	815.58	2800000000	34044.1	850000000	650000000	75.78	6.74233	6.7039	10.4354	20.5549	1490000000	0.531634	13.4981	21.7562	6.75924	5.46633	1	1	197000000	2.80919	301.699	5.70943	2809188	69.9826	0.962302	-0.6318	0	1.1254	2	0.300808	0.230826
3	2005	GERMAN	26.35	640058	826.31	23.15	236.46	799.62	2800000000	34507.4	940000000	750000000	75.98	6.71697	6.68414	10.4489	20.6606	1690000000	0.59222	13.3693	21.7691	6.74233	5.46578	1	1	193000000	2.8458	290.361	5.67112	2845803	67.8569	0.9677	-0.523877	0	1.013	2	0.330038	0.262182
3	2006	GERMAN	26.97	799247	843.79	26.4	236.23	811.75	3000000000	36323.4	1100000000	880000000	76.18	6.7379	6.69919	10.5002	20.7969	1960000000	0.653454	13.5914	21.8193	6.71697	5.46481	1	1	198000000	2.9922	281.997	5.6419	2992197	66.0368	0.962028	-0.425483	0	1.0514	2	0.359745	0.293709
3	2007	GERMAN	27.24	952220	811.05	37.2	235.94	779.33	3400000000	41587.2	1200000000	960000000	76.38	6.69833	6.65843	10.6356	20.9384	2200000000	0.643342	13.7666	21.9533	6.7379	5.46358	1	1	279000000	3.42123	237.064	5.46833	3421229	81.5396	0.96089	-0.441079	0	1.1434	2	0.362441	0.280901
3	2008	GERMAN	26.85	789256	809.37	12.69	235.52	775.44	3700000000	45427.1	1400000000	1100000000	76.58	6.69626	6.65343	10.7239	21.0472	2530000000	0.67727	13.5788	22.0397	6.69833	5.4618	1	1	239000000	3.73003	216.988	5.37984	3730028	64.0602	0.958079	-0.389685	0	1.0903	2	0.370665	0.306605
3	2009	GERMAN	24.74	963511	753.59	29.76	234.94	720.44	3400000000	41485.9	1100000000	890000000	76.77	6.62485	6.57986	10.6331	20.794	1960000000	0.577348	13.7783	21.9464	6.69626	5.45933	1	1	185000000	3.39779	221.788	5.40172	3397791	54.4041	0.95601	-0.54931	0	0.9109	2	0.315876	0.261472
3	2010	GERMAN	26.85	955881	783.16	30.15	234.61	759.04	3400000000	41531.9	1200000000	1000000000	76.97	6.66334	6.63205	10.6342	20.9138	2230000000	0.656674	13.7704	21.946	6.62485	5.45792	1	1	190000000	3.39635	230.588	5.44063	3396354	55.8088	0.969202	-0.420567	0	0.9996	2	0.356242	0.300433
3	2011	GERMAN	27.07	997727	763.69	19.93	230.3	731.41	3700000000	46644.8	1400000000	1200000000	77.16	6.63816	6.59497	10.7503	21.0747	2640000000	0.703817	13.8132	22.0435	6.66334	5.43938	1	1	207000000	3.74441	203.955	5.3179	3744409	55.2586	0.957731	-0.351237	0	1.1025	2	0.379538	0.324279
3	2012	GERMAN	27.28	1100000	772.98	19.83	230.75	744.88	3500000000	43858.4	1400000000	1100000000	77.17	6.65025	6.61322	10.6887	21.0255	2470000000	0.700693	13.8897	21.9838	6.63816	5.44133	1	1	234000000	3.52734	219.139	5.38971	3527345	66.3533	0.963647	-0.355686	0	0.942	2	0.383523	0.31717
3	2013	GERMAN	26.78	967688	797.57	20.52	231.16	759.6	3700000000	46285.8	1400000000	1100000000	77.18	6.68157	6.63279	10.7426	21.0505	2530000000	0.676698	13.7827	22.0404	6.65025	5.44311	1	1	248000000	3.73274	213.669	5.36443	3732744	66.5194	0.952393	-0.390529	0	1.0582	2	0.371609	0.30509
3	2014	GERMAN	27.01	859565	751.08	14.05	232.11	723.27	3900000000	47960	1400000000	1200000000	77.19	6.62151	6.58378	10.7781	21.0796	2590000000	0.66687	13.6642	22.0801	6.68157	5.44721	1	1	266000000	3.88392	193.382	5.26467	3883921	68.5028	0.962973	-0.405161	0	1.0405	2	0.367686	0.299183
3	2015	GERMAN	27.11	781718	755.63	19.23	234.15	729.77	3400000000	41086.7	1300000000	1000000000	77.2	6.62755	6.59273	10.6234	20.9588	2270000000	0.677722	13.5693	21.9341	6.62151	5.45596	1	1	257000000	3.35624	225.142	5.41673	3356236	76.4666	0.965777	-0.389018	0	0.8641	2	0.377094	0.300628
3	2016	GERMAN	27.57	794527	770.46	30.65	235.71	731.62	3500000000	42107.5	1300000000	1000000000	77.22	6.64699	6.59526	10.648	20.9661	2280000000	0.656663	13.5855	21.9667	6.62755	5.4626	1	1	273000000	3.4675	222.195	5.40355	3467498	78.6366	0.949588	-0.420585	0	1.0332	2	0.36765	0.289013
3	2017	GERMAN	27.51	963099	760.95	27.89	236.59	718.79	3700000000	44552.8	1400000000	1100000000	77.26	6.63457	6.57757	10.7044	21.0513	2490000000	0.676751	13.7779	22.0269	6.64699	5.46633	1	1	284000000	3.6826	206.634	5.33095	3682603	77.1959	0.944596	-0.390452	0	1.0594	2	0.376974	0.299778
3	2018	GERMAN	27.38	934445	731.32	24.58	237.29	696.13	4000000000	47810.5	1500000000	1200000000	77.31	6.59485	6.54554	10.775	21.1267	2710000000	0.684787	13.7477	22.1005	6.63457	5.46928	1	1	280000000	3.96377	184.501	5.21766	3963768	70.5532	0.951882	-0.378648	0	1.0785	2	0.37767	0.307117
4	1996	RUSSIAN	35.35	8144.7	1562.93	19.56	9.05	1526.8	390000000	2643.93	67000000	41000000	73.37	7.35432	7.33093	7.88002	18.0239	109000000	0.277308	9.00512	19.7861		2.20276	1	1	25900000	0.391725	3989.87	8.29151	391725	66.0375	0.976883	-1.28263	1	0.9904		0.171673	0.105635
4	1997	RUSSIAN	34.69	13611.9	1463.65	22.6	9.03	1426.42	400000000	2737.57	74000000	48000000	73.36	7.28869	7.26292	7.91483	18.124	122000000	0.301228	9.5187	19.8192	7.35432	2.20055	1	1	26700000	0.404929	3614.59	8.19273	404929	65.8872	0.974564	-1.19989	1	1.0337	1	0.183558	0.117671
4	1998	RUSSIAN	33.94	12911.9	1445.3	30.15	9.01	1416.55	270000000	1834.86	65000000	39000000	73.36	7.27607	7.25598	7.51472	17.9864	103000000	0.381809	9.4659	19.4175	7.28869	2.19834	1	1	26100000	0.270956	5334.09	8.58187	270956	96.2767	0.980108	-0.962834	1	0.6691	1	0.239043	0.142766
4	1999	RUSSIAN	33.5	18302.7	1445.81	39.94	8.98	1456.21	200000000	1330.76	62000000	27000000	73.35	7.27642	7.28359	7.19351	17.9477	88900000	0.453871	9.8148	19.0932	7.27607	2.195	1	1	35700000	0.195907	7380.08	8.90654	195907	182.29	1.00719	-0.789943	1	0.723	1	0.31808	0.13579
4	2000	RUSSIAN	33.92	29738	1452.77	13.5	8.95	1496.72	260000000	1771.59	91000000	30000000	73.35	7.28123	7.31103	7.47963	18.3258	121000000	0.466007	10.3002	19.3751	7.27642	2.19165	1	1	60900000	0.25971	5593.81	8.62942	259710	234.373	1.03025	-0.763555	1	1.3257	1	0.35019	0.115817
4	2001	RUSSIAN	31.84	50544	1466.07	14.18	8.91	1498.1	310000000	2100.35	87000000	38000000	73.35	7.29034	7.31195	7.64986	18.286	125000000	0.407995	10.8306	19.5411	7.28123	2.18717	1	1	49700000	0.306602	4781.67	8.47255	306602	162.108	1.02185	-0.896501	1	1.1806	1	0.285051	0.122943
4	2002	RUSSIAN	29.06	68847	1465.74	16.81	8.87	1487.22	350000000	2377.53	94000000	42000000	73.34	7.29012	7.30466	7.77382	18.3624	136000000	0.394535	11.1396	19.6604	7.29034	2.18268	1	1	52400000	0.345471	4242.74	8.35296	345470	151.617	1.01466	-0.930047	1	1.1268	1	0.273076	0.121459
4	2003	RUSSIAN	28.65	94511	1494.68	18.74	8.83	1517.88	430000000	2975.13	120000000	52000000	73.37	7.30967	7.32507	7.99804	18.5893	171000000	0.396298	11.4565	19.8801	7.29012	2.17815	1	1	66200000	0.430348	3473.19	8.15283	430348	153.81	1.01552	-0.925589	1	1.2457	1	0.275054	0.121244
4	2004	RUSSIAN	31.7	120201	1489.83	19.03	8.79	1509.25	590000000	4102.36	160000000	69000000	73.42	7.30642	7.31937	8.31932	18.9034	231000000	0.390207	11.6969	20.1974	7.30967	2.17361	1	1	93500000	0.591017	2520.79	7.83233	591017	158.179	1.01303	-0.941078	1	1.3733	2	0.274193	0.116014
4	2005	RUSSIAN	32.63	178635	1465.93	17.24	8.76	1511.83	760000000	5323.46	220000000	93000000	73.46	7.29024	7.32108	8.57988	19.2141	314000000	0.41056	12.0931	20.4541	7.30642	2.1702	1	1	129000000	0.764017	1918.71	7.55941	764017	168.22	1.03131	-0.890234	1	1.2927	2	0.28939	0.12117
4	2006	RUSSIAN	31.78	263903	1534.36	21.25	8.73	1566.56	990000000	6920.19	280000000	130000000	73.51	7.33587	7.35664	8.8422	19.4385	406000000	0.409817	12.4833	20.7131	7.29024	2.16676	1	1	148000000	0.989931	1549.97	7.34599	989930	149.23	1.02099	-0.892046	1	1.2957	2	0.279523	0.130293
4	2007	RUSSIAN	31.22	488280	1527.56	23.42	8.72	1566.35	1300000000	9101.26	320000000	190000000	73.55	7.33143	7.3565	9.11617	19.5956	512000000	0.394243	13.0986	20.9854	7.33587	2.16562	1	1	135000000	1.29971	1175.31	7.06929	1299706	104.016	1.02539	-0.930789	1	1.3129	2	0.249129	0.145113
4	2008	RUSSIAN	30.79	212887	1553.77	19.25	8.72	1553.56	1700000000	11635.3	430000000	250000000	73.6	7.34844	7.3483	9.3618	19.8785	683000000	0.411384	12.2685	21.2306	7.33143	2.16562	1	1	176000000	1.66085	935.529	6.84111	1660846	106.019	0.999865	-0.888228	1	1.2779	2	0.258701	0.152682
4	2009	RUSSIAN	29.33	367379	1445.04	24.04	8.72	1440.39	1200000000	8562.81	270000000	160000000	73.64	7.27589	7.27267	9.05518	19.4187	428000000	0.350401	12.8141	20.9243	7.34844	2.16562	1	1	114000000	1.22264	1181.9	7.07488	1222644	93.3675	0.996782	-1.04868	1	0.7362	2	0.221884	0.128517
4	2010	RUSSIAN	30	464228	1492.18	23.82	8.72	1528.92	1500000000	10675	350000000	210000000	73.69	7.30799	7.33232	9.27566	19.6858	565000000	0.370231	13.0481	21.1452	7.27589	2.16562	1	1	144000000	1.52492	978.532	6.88605	1524918	94.5166	1.02462	-0.993627	1	1.2472	2	0.232374	0.137857
4	2011	RUSSIAN	29.41	408942	1555.83	24.37	8.73	1604.4	2000000000	14311.1	460000000	280000000	73.73	7.34976	7.38051	9.56879	19.9488	739000000	0.361256	12.9213	21.4391	7.30799	2.16676	1	1	183000000	2.04593	760.453	6.63391	2045926	89.3654	1.03122	-1.01817	1	1.3417	2	0.225311	0.135945
4	2012	RUSSIAN	29.1	438194	1569.05	25.3	8.74	1550.82	2200000000	15420.9	510000000	310000000	73.79	7.35823	7.34654	9.64348	20.0539	827000000	0.37442	12.9904	21.5155	7.34976	2.16791	1	1	197000000	2.2083	710.525	6.566	2208296	89.3359	0.988381	-0.982377	1	1.0794	2	0.231878	0.142542
4	2013	RUSSIAN	28.19	471475	1527.69	27.02	8.76	1543.12	2300000000	15974.6	510000000	310000000	73.86	7.33151	7.34156	9.67876	20.0578	827000000	0.360878	13.0636	21.5529	7.35823	2.1702	1	1	201000000	2.29247	666.394	6.50188	2292473	87.5967	1.0101	-1.01922	1	1.0381	2	0.224237	0.13664
4	2014	RUSSIAN	27.93	290039	1530.76	24.48	8.78	1467.55	2100000000	14095.7	490000000	290000000	73.95	7.33352	7.29135	9.55362	20.0021	772000000	0.374952	12.5778	21.4456	7.33151	2.17248	1	1	200000000	2.05924	743.361	6.61118	2059242	97.2476	0.958707	-0.980958	1	0.8983	2	0.2361	0.138852
4	2015	RUSSIAN	29.79	262748	1490.97	28.12	8.8	1468.99	1400000000	9313.01	330000000	180000000	74.05	7.30718	7.29233	9.13917	19.624	515000000	0.377749	12.4789	21.0333	7.33352	2.17475	1	1	151000000	1.36348	1093.5	6.99714	1363481	110.869	0.985258	-0.973524	1	0.6621	2	0.244309	0.13344
4	2016	RUSSIAN	29.17	393910	1504.8	28.05	8.81	1438.6	1300000000	8704.9	260000000	210000000	74.16	7.31642	7.27143	9.07164	19.3791	468000000	0.366196	12.8839	20.9676	7.30718	2.17589	1	1	53900000	1.27679	1178.58	7.07207	1276787	42.2472	0.956007	-1.00459	1	0.9364	2	0.204222	0.161974
4	2017	RUSSIAN	30.67	441123	1486.85	31.52	8.82	1536.88	1600000000	10720.3	330000000	260000000	74.29	7.30441	7.33751	9.2799	19.6019	584000000	0.371133	12.9971	21.177	7.31642	2.17702	1	1	67400000	1.5742	944.512	6.85067	1574199	42.8355	1.03365	-0.991194	1	1.2329	2	0.206984	0.164149
4	2018	RUSSIAN	32.82	408097	1548.41	29.45	8.82	1587.02	1700000000	11370.8	390000000	240000000	74.43	7.34498	7.36961	9.33881	19.7759	625000000	0.37451	12.9193	21.2358	7.30441	2.17702	1	1	150000000	1.66958	927.423	6.83241	1669583	89.9983	1.02493	-0.982137	1	1.0528	2	0.232254	0.142256
5	1996	FRANCE	21.68	314647	372.53	4.19	109.12	369.03	1600000000	26871.8	280000000	270000000	75.08	5.92032	5.91088	10.1988	19.4495	550000000	0.342581	12.6592	21.1968		4.69245	1	1	9485568	1.60567	232.008	5.44677	1605675	5.90753	0.990605	-1.07125	0	1.0029		0.174244	0.168337
5	1997	FRANCE	21.53	328951	361.16	2.48	109.51	362.17	1500000000	24228.9	270000000	260000000	75.25	5.88932	5.89211	10.0953	19.426	536000000	0.368848	12.7037	21.0968	5.92032	4.69602	1	1	10700000	1.45288	248.581	5.51577	1452885	7.33813	1.0028	-0.997371	0	0.9048	2	0.188093	0.180755
5	1998	FRANCE	21.44	454047	384.87	5.78	109.92	388.79	1500000000	24974.3	290000000	280000000	75.42	5.95291	5.96304	10.1256	19.4883	574000000	0.381746	13.026	21.1308	5.88932	4.69975	1	1	7857600	1.50311	256.049	5.54537	1503109	5.22757	1.01019	-0.962999	0	1.0346	2	0.193487	0.188259
5	1999	FRANCE	21.2	597283	384.37	8.41	110.48	382.98	1500000000	24673.2	290000000	280000000	75.61	5.95161	5.94798	10.1135	19.4753	570000000	0.381829	13.3002	21.1238	5.95291	4.70483	1	1	4253440	1.49265	257.509	5.55105	1492648	2.84959	0.996384	-0.962784	0	0.993	2	0.192339	0.189489
5	2000	FRANCE	21.29	184215	381.5	7.59	111.24	378.68	1400000000	22364	290000000	300000000	75.87	5.94411	5.93669	10.0152	19.4812	592000000	0.434889	12.1239	21.0324	5.95161	4.71169	1	1	-14900000	1.36225	280.052	5.63497	1362249	-10.923	0.992608	-0.832663	0	0.9126	2	0.211983	0.222906
5	2001	FRANCE	20.94	195513	383.4	9.72	112.05	385.31	1400000000	22433.6	280000000	290000000	76.13	5.94908	5.95405	10.0183	19.4625	577000000	0.419339	12.1834	21.0428	5.94411	4.71894	1	1	-10300000	1.37647	278.539	5.62956	1376465	-7.50102	1.00498	-0.869075	0	1.0104	2	0.205919	0.21342
5	2002	FRANCE	20.65	251729	380.13	9.99	112.87	378.24	1500000000	24177.3	300000000	300000000	76.38	5.94051	5.93553	10.0932	19.5146	602000000	0.403077	12.4361	21.1249	5.94908	4.72624	1	1	-5132352	1.49429	254.389	5.53887	1494287	-3.43465	0.995028	-0.908628	0	1.0856	2	0.199821	0.203256
5	2003	FRANCE	20.19	345577	387.16	9.4	113.61	385.11	1800000000	29568.4	350000000	360000000	76.63	5.95884	5.95353	10.2945	19.6753	713000000	0.387423	12.753	21.3333	5.94051	4.73277	1	1	-11800000	1.84048	210.358	5.34881	1840481	-6.38904	0.994705	-0.948238	0	1.2317	2	0.190517	0.196906
5	2004	FRANCE	19.96	403441	389.12	11.07	114.52	385.21	2100000000	33741.3	410000000	430000000	76.88	5.96389	5.95379	10.4265	19.82	839000000	0.396733	12.9078	21.4727	5.95884	4.74075	1	1	-28900000	2.11574	183.917	5.21448	2115743	-13.6441	0.989952	-0.924492	0	1.1496	2	0.191544	0.205188
5	2005	FRANCE	19.61	379385	389.78	11.22	115.38	388.2	2200000000	34760.2	430000000	480000000	77.13	5.96558	5.96152	10.4562	19.8702	902000000	0.410647	12.8463	21.51	5.96389	4.74823	1	1	-49600000	2.19613	177.485	5.17889	2196126	-22.5984	0.995946	-0.890022	0	1.038	2	0.194024	0.216622
5	2006	FRANCE	19.28	493763	380.05	10.99	116.19	379.55	2300000000	36443.6	470000000	530000000	77.38	5.9403	5.93899	10.5035	19.9666	999000000	0.430876	13.1098	21.5642	5.96558	4.75523	1	1	-60500000	2.31859	163.914	5.09934	2318594	-26.1059	0.998684	-0.841934	0	1.0558	2	0.202385	0.228491
5	2007	FRANCE	19.14	623625	370.47	10.4	116.91	373.06	2700000000	41508.4	530000000	610000000	77.62	5.91477	5.92174	10.6336	20.0837	1140000000	0.428524	13.3433	21.7005	5.9403	4.7614	1	1	-83700000	2.65721	139.421	4.9375	2657213	-31.4916	1.00699	-0.847409	0	1.146	2	0.198516	0.230008
5	2008	FRANCE	18.81	563005	369.75	9.04	117.57	349.14	2900000000	45334.1	580000000	690000000	77.87	5.91283	5.85547	10.7218	20.18	1280000000	0.437076	13.241	21.7943	5.91477	4.76703	1	1	-114000000	2.91838	126.697	4.8418	2918383	-38.9982	0.94426	-0.827648	0	1.0983	2	0.199039	0.238037
5	2009	FRANCE	18.3	648012	354.8	12.92	118.17	333.41	2700000000	41575.4	450000000	540000000	78.12	5.87155	5.80937	10.6353	19.9304	993000000	0.369042	13.3817	21.7129	5.91283	4.77212	1	1	-87700000	2.69022	131.885	4.88193	2690222	-32.6024	0.939713	-0.996845	0	0.9218	2	0.16822	0.200822
5	2010	FRANCE	17.85	630710	360.37	11.84	118.76	340.08	2600000000	40638.3	500000000	600000000	78.37	5.88713	5.82918	10.6125	20.0282	1100000000	0.41546	13.3546	21.695	5.87155	4.7771	1	1	-99900000	2.64261	136.369	4.91536	2642610	-37.7868	0.943697	-0.87837	0	0.9823	2	0.188836	0.226623
5	2011	FRANCE	17.98	698871	334.11	10.79	119.34	310.45	2900000000	43790.7	570000000	710000000	78.62	5.81147	5.73802	10.6872	20.1624	1280000000	0.44865	13.4572	21.7746	5.88713	4.78198	1	1	-142000000	2.86141	116.764	4.76016	2861408	-49.7298	0.929185	-0.801513	0	1.0828	2	0.19946	0.24919
5	2012	FRANCE	17.87	680410	335.55	12.35	119.91	311.7	2700000000	40874.7	540000000	670000000	78.88	5.81577	5.74204	10.6183	20.1152	1210000000	0.451069	13.4305	21.7105	5.81147	4.78674	1	1	-122000000	2.68383	125.027	4.82853	2683826	-45.3686	0.928923	-0.796135	0	0.9379	2	0.20285	0.248219
5	2013	FRANCE	17.97	761372	334.88	13.19	120.53	315.57	2800000000	42592.9	550000000	670000000	79.14	5.81377	5.75438	10.6594	20.1329	1220000000	0.435745	13.5429	21.7568	5.81577	4.7919	1	1	-117000000	2.81108	119.129	4.7802	2811078	-41.5086	0.942338	-0.830697	0	1.0474	2	0.197118	0.238627
5	2014	FRANCE	17.75	700065	301.3	12.09	121.11	285.68	2900000000	43011.3	550000000	660000000	79.39	5.70811	5.65487	10.6692	20.13	1210000000	0.424907	13.4589	21.7714	5.81377	4.7967	1	1	-107000000	2.85217	105.639	4.66003	2852166	-37.4853	0.948158	-0.855885	0	1.0146	2	0.193711	0.231196
5	2015	FRANCE	17.68	687372	306.66	12.25	121.54	290.49	2400000000	36638.2	480000000	560000000	79.66	5.72574	5.67157	10.5089	19.9931	1040000000	0.428535	13.4406	21.6145	5.70811	4.80024	1	1	-81200000	2.43821	125.773	4.83448	2438208	-33.2868	0.947271	-0.847383	0	0.8549	2	0.197624	0.230911
5	2016	FRANCE	17.43	694896	312.1	12.59	121.86	292.92	2500000000	37037.4	480000000	560000000	79.92	5.74332	5.6799	10.5197	19.9829	1040000000	0.419631	13.4515	21.628	5.72574	4.80287	1	1	-83100000	2.47129	126.29	4.83859	2471286	-33.6331	0.938545	-0.868379	0	1.0136	2	0.192999	0.226632
5	2017	FRANCE	17.24	819308	318.11	14.13	122.11	306.12	2600000000	38812.2	510000000	610000000	80.18	5.7624	5.72398	10.5665	20.0513	1120000000	0.4328	13.6162	21.6769	5.74332	4.80492	1	1	-102000000	2.59515	122.579	4.80875	2595151	-39.2141	0.962309	-0.837479	0	1.0475	2	0.196793	0.236007
5	2018	FRANCE	17.07	820572	307.2	13.79	122.3	303.48	2800000000	41631.1	550000000	660000000	80.44	5.7275	5.71532	10.6366	20.1345	1210000000	0.435342	13.6178	21.7485	5.7624	4.80648	1	1	-104000000	2.78786	110.192	4.70222	2787864	-37.1899	0.987891	-0.831623	0	1.0764	2	0.199076	0.236266
6	1996	KOREA	35.45	25730	413.62	21.09	471.95	383.72	610000000	13403	130000000	150000000	78.66	6.02495	5.94991	9.50324	18.6807	280000000	0.45866	10.1554	20.2293		6.15687	1	1	-20500000	0.61017	677.877	6.51897	610170	-33.5465	0.927711	-0.779446	0	1.0769		0.212557	0.246103
6	1997	KOREA	35.4	14170	438.25	20.76	476.4	407.91	570000000	12398.5	140000000	140000000	78.9	6.08279	6.01105	9.42533	18.7293	281000000	0.49264	9.55888	20.1607	6.02495	6.16626	1	1	-8385984	0.569755	769.191	6.64534	569754	-14.7186	0.93077	-0.707977	0	0.9338	2	0.238961	0.253679
6	1998	KOREA	35.31	22190	377.91	22.61	479.85	351.06	380000000	8281.7	130000000	91000000	79.15	5.93466	5.86096	9.0218	18.6672	219000000	0.570979	10.0074	19.7644	6.08279	6.17347	1	1	37100000	0.383331	985.858	6.89351	383331	96.6568	0.928951	-0.560402	0	0.6728	2	0.333818	0.237161
6	1999	KOREA	34.67	41850	412.08	25.79	483.27	385.35	500000000	10672.4	140000000	120000000	79.38	6.02122	5.95415	9.27542	18.7444	255000000	0.51293	10.6418	20.0251	5.93466	6.18058	1	1	21300000	0.497513	828.28	6.71935	497513	42.7585	0.935134	-0.667616	0	1.2979	2	0.277844	0.235086
6	2000	KOREA	34.76	43738	440.65	43.64	487.33	437.72	580000000	12257	170000000	160000000	79.62	6.08825	6.08158	9.41385	18.9643	333000000	0.577325	10.686	20.1719	6.02122	6.18894	1	1	11800000	0.576178	764.781	6.63959	576178	20.5108	0.993351	-0.549351	0	1.1581	2	0.298918	0.278407
6	2001	KOREA	33.22	53207.5	452.88	42.95	489.66	452.07	550000000	11561.3	150000000	140000000	79.94	6.11563	6.11384	9.35541	18.8287	291000000	0.532148	10.8819	20.1212	6.08825	6.19371	1	1	9338016	0.547658	826.939	6.71773	547658	17.0508	0.998211	-0.630833	0	0.9505	2	0.2746	0.257549
6	2002	KOREA	32.81	62658.3	470.85	38.19	492.25	446.13	630000000	13165.1	160000000	150000000	80.3	6.15454	6.10061	9.48532	18.9057	314000000	0.501367	11.0455	20.2569	6.11563	6.19899	1	1	10400000	0.627246	750.662	6.62096	627246	16.5221	0.947499	-0.690417	0	1.1453	2	0.258945	0.242422
6	2003	KOREA	33.11	66069.7	480.46	49.12	494.76	448.91	700000000	14672.9	190000000	180000000	80.65	6.17474	6.10682	9.59375	19.0822	373000000	0.530151	11.0985	20.3705	6.15454	6.20407	1	1	15000000	0.702717	683.717	6.52754	702717	21.334	0.934334	-0.634594	0	1.1203	2	0.275742	0.254408
6	2004	KOREA	34.73	87766.4	491.18	53	496.62	469.82	790000000	16496.1	250000000	220000000	81	6.19681	6.15235	9.71088	19.352	478000000	0.602898	11.3824	20.4916	6.17474	6.20782	1	1	29400000	0.793175	619.258	6.42852	793175	37.0489	0.956513	-0.506008	0	1.1287	2	0.319973	0.282924
6	2005	KOREA	34.15	104879	498.58	54.44	497.52	469.12	930000000	19402.5	280000000	260000000	81.35	6.21176	6.15086	9.87316	19.4658	546000000	0.583535	11.5606	20.656	6.19681	6.20964	1	1	23200000	0.934901	533.297	6.27908	934901	24.798	0.940912	-0.538651	0	1.1787	2	0.304167	0.279369
6	2006	KOREA	33.52	115774	503.69	53.58	499.98	476.69	1100000000	21743.5	330000000	310000000	81.53	6.22196	6.16687	9.98707	19.6005	635000000	0.602654	11.6594	20.7751	6.21176	6.21457	1	1	16100000	1.05322	478.24	6.17011	1053217	15.2545	0.946396	-0.506412	0	1.1266	2	0.308954	0.2937
6	2007	KOREA	33.45	121957	516.72	70.33	502.31	490.43	1200000000	24086.4	370000000	360000000	81.63	6.2475	6.19528	10.0894	19.7328	728000000	0.621011	11.7114	20.8825	6.22196	6.21922	1	1	14600000	1.17261	440.656	6.08826	1172614	12.482	0.949121	-0.476406	0	1.1134	2	0.316747	0.304265
6	2008	KOREA	32.51	94721.5	531.14	39.94	505.77	488.68	1000000000	21350.4	420000000	440000000	81.73	6.27503	6.19171	9.96883	19.8604	857000000	0.818429	11.4587	20.7695	6.2475	6.22608	1	1	-13300000	1.04734	507.133	6.22877	1047339	-12.6659	0.920059	-0.200368	0	0.8932	2	0.402882	0.415548
6	2009	KOREA	32.91	121933	534.15	63.1	508.01	501.93	940000000	19143.8	360000000	320000000	81.83	6.28068	6.21846	9.85974	19.7112	687000000	0.727295	11.7112	20.6656	6.27503	6.2305	1	1	40400000	0.943942	565.872	6.33837	943942	42.8474	0.93968	-0.318422	0	0.9013	2	0.385072	0.342224
6	2010	KOREA	34.12	135500	590.91	60.84	509.82	550.8	1100000000	23087.2	470000000	430000000	81.94	6.38166	6.31137	10.047	19.9604	891000000	0.779213	11.8167	20.8578	6.28068	6.23406	1	1	41200000	1.14407	516.5	6.24707	1144067	35.9916	0.932122	-0.249471	0	1.212	2	0.407602	0.371611
6	2011	KOREA	34.45	135178	617.68	48.12	513.8	573.56	1300000000	25096.3	560000000	520000000	81.92	6.42597	6.35186	10.1305	20.1347	1080000000	0.861346	11.8143	20.949	6.38166	6.24183	1	1	30800000	1.25322	492.873	6.20025	1253223	24.5969	0.928571	-0.149259	0	1.0954	2	0.442971	0.418374
6	2012	KOREA	34.13	157876	614.57	52.14	515.88	575.27	1300000000	25466.8	550000000	520000000	81.85	6.42092	6.35484	10.1451	20.1214	1070000000	0.834883	11.9696	20.9689	6.42597	6.24587	1	1	28200000	1.27843	480.723	6.17529	1278428	22.0866	0.936053	-0.180464	0	1.0201	2	0.428485	0.406398
6	2013	KOREA	34.45	180860	619.48	53.19	517.61	572.25	1400000000	27182.7	560000000	520000000	81.78	6.42888	6.34958	10.2103	20.1426	1080000000	0.784309	12.1055	21.0387	6.42092	6.24922	1	1	44000000	1.37079	451.913	6.11349	1370795	32.0848	0.923759	-0.242952	0	1.0723	2	0.408197	0.376112
6	2014	KOREA	34.09	179441	614.91	55.15	520.85	567.81	1500000000	29249.6	570000000	530000000	81.71	6.42148	6.34179	10.2836	20.1664	1100000000	0.74012	12.0976	21.1182	6.42888	6.25546	1	1	47500000	1.48432	414.271	6.02652	1484318	31.9745	0.923403	-0.300943	0	1.0828	2	0.386047	0.354073
6	2015	KOREA	34.15	179544	624.17	51.81	523.53	585.99	1500000000	28732.2	530000000	440000000	81.63	6.43642	6.3733	10.2658	20.0821	963000000	0.657116	12.0982	21.1057	6.42148	6.26059	1	1	90200000	1.46577	425.83	6.05404	1465773	61.544	0.938831	-0.419895	0	0.9875	2	0.35933	0.297786
6	2016	KOREA	34.3	188877	629.56	59.04	525.37	589.17	1500000000	29288.9	500000000	410000000	81.56	6.44502	6.37871	10.285	20.0208	902000000	0.600982	12.1488	21.1288	6.43642	6.2641	1	1	89200000	1.50011	419.675	6.03948	1500112	59.447	0.935844	-0.509189	0	1.0234	2	0.330215	0.270768
6	2017	KOREA	34.77	229399	645.19	58.58	526.73	600.03	1600000000	31616.8	570000000	480000000	81.5	6.46955	6.39698	10.3614	20.1674	1050000000	0.647772	12.3432	21.2081	6.44502	6.26669	1	1	95200000	1.6239	397.309	5.98471	1623902	58.6469	0.930005	-0.434217	0	1.0825	2	0.353209	0.294562
6	2018	KOREA	34.05	237238	662.19	49.76	529.19	605.78	1700000000	33422.9	600000000	540000000	81.46	6.49555	6.40652	10.417	20.2203	1140000000	0.660837	12.3768	21.2684	6.46955	6.27135	1	1	69700000	1.72485	383.913	5.95041	1724846	40.3936	0.914813	-0.414247	0	1.0622	2	0.350616	0.310222
7	1996	CANANDA	30.91	132978	471.62	15.14	3.3	476.17	630000000	21227.3	190000000	160000000	77.95	6.15617	6.16578	9.96305	19.0671	355000000	0.564676	11.7979	20.2589		1.19392	1	1	26800000	0.628546	750.334	6.62052	628546	42.6679	1.00965	-0.571503	0	1.0406		0.303672	0.261004
7	1997	CANANDA	28.01	135944	486.14	18.98	3.34	492.77	650000000	21829.2	200000000	190000000	78.34	6.1865	6.20004	9.991	19.1331	394000000	0.603988	11.82	20.2968	6.15617	1.20597	1	1	13500000	0.652824	744.673	6.61294	652824	20.6716	1.01364	-0.504201	0	1.0421	2	0.31233	0.291658
7	1998	CANANDA	27.15	143345	500.05	23.9	3.36	497.32	630000000	20952.1	200000000	200000000	78.72	6.21471	6.20923	9.94999	19.1184	397000000	0.628001	11.873	20.2641	6.1865	1.21194	1	1	5060720	0.631813	791.452	6.67387	631813	8.00983	0.994541	-0.465213	0	0.968	2	0.318005	0.309996
7	1999	CANANDA	28.24	174990	506.08	28.88	3.39	507.95	680000000	22238.7	220000000	210000000	79.1	6.2267	6.23038	10.0096	19.2184	432000000	0.638856	12.0725	20.3318	6.21471	1.22083	1	1	12200000	0.676084	748.546	6.61813	676084	17.9949	1.0037	-0.448076	0	1.0701	2	0.328425	0.31043
7	2000	CANANDA	29.88	325020	527.61	26.98	3.42	528.57	740000000	24190.3	260000000	240000000	79.48	6.26836	6.27018	10.0937	19.3823	497000000	0.669533	12.6916	20.4253	6.2267	1.22964	1	1	26200000	0.742295	710.782	6.56637	742296	35.3263	1.00182	-0.401174	0	1.0978	2	0.35243	0.317103
7	2001	CANANDA	28.85	317369	525.54	24.04	3.46	520.31	740000000	23738.2	250000000	220000000	79.81	6.26443	6.25443	10.0748	19.3177	462000000	0.627428	12.6678	20.4173	6.26836	1.24127	1	1	28400000	0.73638	713.681	6.57044	736380	38.5762	0.990048	-0.466126	0	0.9922	2	0.333002	0.294426
7	2002	CANANDA	27.97	290473	536.5	18.37	3.5	526.67	760000000	24169.3	240000000	220000000	79.89	6.28507	6.26657	10.0928	19.2814	455000000	0.600086	12.5793	20.4461	6.26443	1.25276	1	1	18100000	0.757951	707.83	6.5622	757951	23.9262	0.981677	-0.510682	0	1.0293	2	0.312006	0.28808
7	2003	CANANDA	28.3	439940	548.09	21.28	3.53	548.89	890000000	28200.7	260000000	240000000	79.97	6.30644	6.3079	10.2471	19.366	494000000	0.553138	12.9944	20.6094	6.28507	1.2613	1	1	21100000	0.892382	614.187	6.4203	892382	23.6771	1.00146	-0.592148	0	1.1773	2	0.288408	0.26473
7	2004	CANANDA	28.8	544147	541.75	22.1	3.56	543.28	1000000000	32034.3	300000000	270000000	80.05	6.29481	6.29763	10.3746	19.5251	571000000	0.558197	13.207	20.7462	6.30644	1.26976	1	1	32400000	1.0232	529.468	6.27187	1023197	31.6373	1.00282	-0.583043	0	1.1464	2	0.294917	0.26328
7	2005	CANANDA	29.63	638650	542.71	21.48	3.6	549.12	1200000000	36266.2	340000000	310000000	80.12	6.29657	6.30832	10.4986	19.6571	654000000	0.559316	13.3671	20.8797	6.29481	1.28093	1	1	34600000	1.16936	464.109	6.14012	1169358	29.6011	1.01181	-0.58104	0	1.1426	2	0.294459	0.264858
7	2006	CANANDA	29.25	706901	527.61	23.69	3.63	540.4	1300000000	40385.9	370000000	340000000	80.21	6.26836	6.29231	10.6062	19.7341	717000000	0.544856	13.4687	20.9974	6.29657	1.28923	1	1	27100000	1.31542	401.098	5.99421	1315415	20.5701	1.02424	-0.607234	0	1.1246	2	0.282713	0.262143
7	2007	CANANDA	29.08	1000000	551.7	24.42	3.67	569.39	1500000000	44543	400000000	370000000	80.4	6.313	6.34457	10.7042	19.8158	778000000	0.530739	13.848	21.1051	6.26836	1.30019	1	1	29500000	1.46498	376.593	5.93117	1464977	20.1636	1.03207	-0.633486	0	1.1134	2	0.275451	0.255288
7	2008	CANANDA	29.72	620191	545.63	16.79	3.71	538.83	1500000000	46594.4	440000000	400000000	80.58	6.30194	6.2894	10.7492	19.8998	840000000	0.542357	13.3378	21.161	6.313	1.31103	1	1	37600000	1.54913	352.217	5.86425	1549131	24.296	0.987537	-0.611831	0	1.0573	2	0.283326	0.25903
7	2009	CANANDA	25.45	867387	503.76	20.59	3.75	504.17	1400000000	40773.1	300000000	320000000	80.76	6.2221	6.22291	10.6158	19.5265	618000000	0.450762	13.6732	21.0389	6.30194	1.32176	1	1	-13700000	1.37115	367.399	5.90645	1371153	-10.0194	1.00081	-0.796815	0	0.8851	2	0.220371	0.230391
7	2010	CANANDA	26.71	983890	530.09	22.68	3.79	515.24	1600000000	47448	370000000	390000000	80.94	6.27305	6.24463	10.7674	19.7415	760000000	0.471338	13.7993	21.2017	6.2221	1.33237	1	1	-11200000	1.61346	328.541	5.79466	1613465	-6.93907	0.971986	-0.75218	0	1.1766	2	0.232199	0.239138
7	2011	CANANDA	27.52	862698	541.02	22.37	3.83	524.44	1800000000	52087.4	440000000	440000000	81.1	6.29346	6.26233	10.8607	19.8963	881000000	0.492406	13.6678	21.3047	6.27305	1.34286	1	1	-5986016	1.78865	302.474	5.712	1788648	-3.34667	0.969354	-0.708452	0	1.1088	2	0.24453	0.247876
7	2012	CANANDA	26.63	953503	526.31	24.03	3.87	523.94	1800000000	52678.4	440000000	460000000	81.14	6.26589	6.26138	10.872	19.9035	896000000	0.489733	13.7679	21.3269	6.29346	1.35325	1	1	-14500000	1.82869	287.807	5.66229	1828689	-7.9497	0.995497	-0.713895	0	1.0195	2	0.240892	0.248841
7	2013	CANANDA	26.61	982529	544.1	29.3	3.91	536.32	1800000000	52652.6	440000000	450000000	81.18	6.29913	6.28473	10.8715	19.9068	895000000	0.484659	13.7979	21.3369	6.26589	1.36354	1	1	-11300000	1.84721	294.553	5.68546	1847209	-6.12198	0.985701	-0.72431	0	1.01	2	0.239268	0.24539
7	2014	CANANDA	27.14	994712	553.46	30.95	3.95	554.8	1800000000	50893.4	460000000	450000000	81.22	6.31619	6.31861	10.8375	19.9428	913000000	0.505997	13.8102	21.313	6.29913	1.37372	1	1	3783008	1.80353	306.875	5.72644	1803533	2.09755	1.00242	-0.681224	0	0.9779	2	0.254047	0.25195
7	2015	CANANDA	24.42	806298	546.23	31.27	3.98	549.23	1600000000	43585.5	390000000	410000000	81.26	6.30304	6.30852	10.6825	19.7818	801000000	0.514834	13.6002	21.1655	6.31619	1.38128	1	1	-21000000	1.55613	351.018	5.86084	1556130	-13.5079	1.00549	-0.663912	0	0.862	2	0.250663	0.264171
7	2016	CANANDA	23.3	903454	537.78	35	4.03	540.77	1500000000	42322.5	370000000	390000000	81.3	6.28745	6.29299	10.6531	19.7253	763000000	0.499098	13.714	21.1474	6.30304	1.39377	1	1	-25500000	1.52824	351.894	5.86333	1528243	-16.6731	1.00556	-0.694952	0	0.9817	2	0.241213	0.257886
7	2017	CANANDA	29.75	966685	549.11	39.97	4.08	547.8	1600000000	45148.6	390000000	420000000	81.35	6.3083	6.30591	10.7177	19.7867	815000000	0.494276	13.7816	21.224	6.28745	1.4061	1	1	-31600000	1.64988	332.818	5.8076	1649878	-19.1254	0.997614	-0.704661	0	1.0794	2	0.237575	0.256701
7	2018	CANANDA	32.5	852196	565.64	35.94	4.13	565.23	1700000000	46313.2	430000000	450000000	81.41	6.33796	6.33723	10.7432	19.8792	880000000	0.51279	13.6556	21.2634	6.3083	1.41828	1	1	-20200000	1.71626	329.577	5.79781	1716263	-11.7442	0.999275	-0.667889	0	1.044	2	0.250523	0.262267
8	1996	US	25.83	1200000	5407.87	11.41	29.41	5303.73	8100000000	29967.7	600000000	780000000	77.64	8.59561	8.57616	10.3079	20.2094	1370000000	0.170236	14.0218	22.8118		3.38133	1	1	-178000000	8.07312	669.861	6.50707	8073122	-22.0483	0.980743	-1.77057	0	1.0567		0.0740937	0.096142
8	1997	US	23.13	1600000	5483.18	11.15	29.77	5482.1	8600000000	31459.1	660000000	850000000	78.01	8.60944	8.60924	10.3565	20.3102	1520000000	0.176627	14.3086	22.8724	8.59561	3.3935	1	1	-192000000	8.57756	639.247	6.46029	8577554	-22.3636	0.999803	-1.73371	0	1.0625	2	0.0771319	0.0994954
8	1998	US	22.67	2200000	5524.2	12.08	30.12	5479.44	9100000000	32853.7	660000000	900000000	78.38	8.61689	8.60876	10.3998	20.3009	1550000000	0.17126	14.5944	22.9275	8.60944	3.40519	1	1	-241000000	9.06282	609.545	6.41271	9062818	-26.601	0.991897	-1.76457	0	1.0566	2	0.0723297	0.0989307
8	1999	US	22.55	2800000	5574.14	14.74	30.47	5505.78	9600000000	34513.6	670000000	1000000000	78.74	8.62589	8.61355	10.4491	20.3178	1670000000	0.173012	14.8445	22.9882	8.61689	3.41674	1	1	-333000000	9.63066	578.791	6.36094	9630664	-34.569	0.987736	-1.75439	0	1.0627	2	0.0692217	0.103791
8	2000	US	22.45	2800000	5740.77	17.19	30.8	5698.15	10000000000	36334.9	760000000	1200000000	79.06	8.65535	8.6479	10.5005	20.4423	1920000000	0.187717	14.8391	23.0508	8.62589	3.42752	1	1	-414000000	10.2523	559.947	6.32784	10300000	-40.4245	0.992576	-1.67282	0	1.0646	2	0.0736461	0.114071
8	2001	US	21.47	2600000	5650.72	21.09	31.1	5677.65	11000000000	37133.2	700000000	1100000000	79.23	8.63954	8.64429	10.5223	20.3714	1800000000	0.169693	14.7556	23.0824	8.65535	3.43721	1	1	-389000000	10.5818	534.003	6.2804	10600000	-36.7463	1.00477	-1.77377	0	1.0321	2	0.0664733	0.10322
8	2002	US	20.64	2000000	5672.4	21.28	31.39	5605.21	11000000000	38023.2	670000000	1200000000	79.41	8.64337	8.63145	10.5459	20.3208	1820000000	0.166368	14.5195	23.1154	8.63954	3.44649	1	1	-482000000	10.9364	518.671	6.25127	10900000	-44.0868	0.988155	-1.79355	0	1.0335	2	0.0611406	0.105227
8	2003	US	20.74	2500000	5737.87	24.03	31.66	5681.05	11000000000	39496.5	700000000	1300000000	79.58	8.65484	8.64489	10.584	20.3668	1950000000	0.170615	14.7136	23.162	8.64337	3.45505	1	1	-555000000	11.4582	500.764	6.21613	11500000	-48.4046	0.990097	-1.76835	0	1.0477	2	0.061105	0.10951
8	2004	US	20.96	2700000	5838.97	26.43	31.96	5765.57	12000000000	41712.8	740000000	1500000000	79.76	8.67231	8.65966	10.6386	20.4257	2220000000	0.181574	14.8152	23.2258	8.65484	3.46448	1	1	-732000000	12.2137	478.066	6.16975	12200000	-59.9669	0.987429	-1.70609	0	1.0659	2	0.0608035	0.12077
8	2005	US	21.22	2800000	5873.13	28.28	32.25	5773.51	13000000000	44114.8	820000000	1700000000	79.93	8.67814	8.66104	10.6945	20.5206	2500000000	0.191455	14.8515	23.291	8.67231	3.47352	1	1	-863000000	13.0366	450.51	6.11038	13000000	-66.1886	0.983038	-1.6531	0	1.0674	2	0.0626333	0.128822
8	2006	US	21.59	3300000	5795.1	28.45	32.57	5684.44	14000000000	46298.7	1000000000	1900000000	80.1	8.66477	8.64549	10.7429	20.7276	2860000000	0.207322	15.0073	23.349	8.67814	3.48339	1	1	-855000000	13.8146	419.491	6.03904	13800000	-61.9262	0.980904	-1.57348	0	1.0597	2	0.0726981	0.134624
8	2007	US	21.45	3600000	5884.15	29.62	32.88	5761.89	14000000000	47976	1100000000	2000000000	80.27	8.68002	8.65902	10.7785	20.8406	3080000000	0.213138	15.0828	23.3941	8.66477	3.49287	1	1	-831000000	14.4519	407.155	6.00919	14500000	-57.5135	0.979222	-1.54581	0	1.0461	2	0.0778122	0.135326
8	2008	US	20.86	2500000	5699.11	25.3	33.24	5511.62	15000000000	48382.6	1300000000	2100000000	80.44	8.64807	8.61461	10.7869	20.9562	3360000000	0.228538	14.7264	23.412	8.68002	3.50375	1	1	-838000000	14.7128	387.356	5.95934	14700000	-56.9539	0.967102	-1.47605	0	1.0181	2	0.0857918	0.142746
8	2009	US	19.32	3000000	5289.14	37.67	33.54	5119.87	14000000000	47100	950000000	1500000000	80.61	8.57341	8.54088	10.76	20.6731	2500000000	0.172849	14.9126	23.3939	8.64807	3.51274	1	1	-595000000	14.4489	366.058	5.90279	14400000	-41.2048	0.967997	-1.75534	0	0.9821	2	0.065822	0.107027
8	2010	US	19.36	3400000	5485.72	36.83	33.82	5355.48	15000000000	48467.5	1200000000	1900000000	80.77	8.6099	8.58588	10.7887	20.8765	3080000000	0.205277	15.0458	23.4308	8.57341	3.52105	1	1	-746000000	14.9921	365.909	5.90238	15000000	-49.7817	0.976258	-1.5834	0	1.0376	2	0.0777476	0.127529
8	2011	US	19.42	3500000	5336.44	32.5	34.06	5219.04	16000000000	49886.8	1400000000	2200000000	80.94	8.58231	8.56007	10.8175	21.0319	3560000000	0.229331	15.0679	23.4669	8.6099	3.52812	1	1	-841000000	15.5426	343.343	5.83873	15500000	-54.1198	0.978	-1.47259	0	1.0367	2	0.0876058	0.141726
8	2012	US	19.16	3900000	5089.97	38.2	34.31	5031.67	16000000000	51610.6	1400000000	2200000000	81.12	8.53503	8.52351	10.8515	21.0668	3620000000	0.223386	15.1805	23.5081	8.58231	3.53544	1	1	-798000000	16.197	314.254	5.7502	16200000	-49.2817	0.988546	-1.49885	0	1.0421	2	0.0870521	0.136334
8	2013	US	19.26	4900000	5249.6	38.42	34.54	5119.7	17000000000	53117.7	1400000000	2200000000	81.3	8.56591	8.54085	10.8803	21.0813	3630000000	0.216032	15.4146	23.5437	8.53503	3.54212	1	1	-765000000	16.7848	312.758	5.74543	16800000	-45.5854	0.975255	-1.53233	0	1.0363	2	0.0852233	0.130809
8	2014	US	19.33	5500000	5254.57	37.4	34.8	5176.21	18000000000	55064.7	1500000000	2300000000	81.48	8.56685	8.55183	10.9163	21.1041	3800000000	0.216814	15.5124	23.587	8.56591	3.54962	1	1	-873000000	17.5272	299.796	5.7031	17500000	-49.824	0.985087	-1.52871	0	1.0442	2	0.0834952	0.133319
8	2015	US	18.53	5700000	5141.41	42.89	35.05	4997.5	18000000000	56839.4	1300000000	2200000000	81.67	8.54508	8.51669	10.948	21.0166	3570000000	0.19585	15.5615	23.626	8.56685	3.55678	1	1	-887000000	18.2247	282.112	5.64231	18200000	-48.692	0.97201	-1.63041	0	1.0406	2	0.0735789	0.122271
8	2016	US	17.98	6600000	5042.43	43.92	35.3	4833.08	19000000000	57951.6	1300000000	2200000000	81.86	8.52564	8.48324	10.9674	20.9778	3450000000	0.184375	15.7005	23.6526	8.54508	3.56388	1	1	-871000000	18.715	269.433	5.59632	18700000	-46.5346	0.958482	-1.69078	0	1.0278	2	0.0689203	0.115455
8	2017	US	18.34	7800000	4983.87	42.36	35.53	4761.3	20000000000	60062.2	1400000000	2300000000	82.06	8.51396	8.46828	11.0031	21.0448	3680000000	0.188764	15.8753	23.6947	8.52564	3.57038	1	1	-926000000	19.5193	255.33	5.54256	19500000	-47.4457	0.955342	-1.66726	0	1.0426	2	0.0706589	0.118105
8	2018	US	18.64	7400000	5116.79	41.79	35.71	4921.13	21000000000	62996.5	1500000000	2500000000	82.26	8.54028	8.50129	11.0508	21.1193	3990000000	0.193811	15.8213	23.7476	8.51396	3.57543	1	1	-1020000000	20.5802	248.627	5.51595	20600000	-49.4097	0.961761	-1.64087	0	1.0547	2	0.0722007	0.12161
9	1996	MEXIC	33.95	46912	306.3	8.97	47.92	309.62	410000000	4412.12	95000000	86000000	73.67	5.72457	5.73535	8.39211	18.3704	181000000	0.440837	10.756	19.834		3.86953	1	1	9021976	0.410976	745.3	6.61379	410976	21.9526	1.01084	-0.819081	0	1.1414		0.231395	0.209442
9	1997	MEXIC	34.2	55810	319.93	10.97	48.67	319.69	500000000	5289.17	110000000	110000000	73.93	5.7681	5.76735	8.57342	18.5102	216000000	0.430746	10.9297	20.0309	5.72457	3.88506	1	1	3178600	0.500413	639.331	6.46042	500414	6.35195	0.99925	-0.842237	0	1.2176	2	0.218549	0.212197
9	1998	MEXIC	33.88	63610.4	337.09	11.38	49.41	338.39	530000000	5481.18	120000000	120000000	74.19	5.82035	5.8242	8.60908	18.5756	236000000	0.44881	11.0605	20.0818	5.7681	3.90015	1	1	-2785232	0.526502	640.244	6.46185	526502	-5.29007	1.00386	-0.801155	0	1.0521	2	0.22176	0.22705
9	1999	MEXIC	34.12	88470.3	333.9	37.89	50.15	334.32	600000000	6157.19	140000000	140000000	74.44	5.81084	5.8121	8.72538	18.7227	272000000	0.452495	11.3904	20.2128	5.82035	3.91502	1	1	-1077616	0.600233	556.284	6.32128	600233	-1.79533	1.00126	-0.79298	0	1.14	2	0.22535	0.227145
9	2000	MEXIC	34.21	121691	353.85	31.86	50.88	349.55	710000000	7157.81	170000000	170000000	74.72	5.86887	5.85665	8.87596	18.9287	336000000	0.474917	11.7092	20.3778	5.81084	3.92947	1	1	-3784960	0.707907	499.854	6.21432	707907	-5.34669	0.987848	-0.744616	0	1.1794	2	0.234785	0.240132
9	2001	MEXIC	33.22	157305	352.35	28.55	51.6	350	760000000	7544.57	160000000	170000000	75.05	5.86463	5.85793	8.92858	18.8799	326000000	0.430538	11.9659	20.4445	5.86887	3.94352	1	1	-9231840	0.756706	465.636	6.1434	756706	-12.2	0.993331	-0.842719	0	1.0689	2	0.209169	0.221369
9	2002	MEXIC	32.71	156562	371.59	31.07	52.31	356.69	770000000	7593.14	160000000	170000000	75.37	5.91779	5.87687	8.935	18.892	326000000	0.421832	11.9612	20.4646	5.86463	3.95719	1	1	-5288864	0.772106	481.268	6.17642	772106	-6.84992	0.959902	-0.863147	0	1.0204	2	0.207491	0.214341
9	2003	MEXIC	31.19	162855	372.86	32.56	53.03	363.19	730000000	7075.37	160000000	170000000	75.68	5.9212	5.89493	8.86438	18.9204	334000000	0.458394	12.0006	20.4077	5.91779	3.97086	1	1	-4670864	0.729336	511.232	6.23682	729336	-6.40427	0.974065	-0.780026	0	0.9446	2	0.225995	0.232399
9	2004	MEXIC	32.85	192654	390.43	35.12	53.76	368.84	780000000	7484.49	190000000	190000000	76	5.96725	5.91036	8.92059	19.0509	383000000	0.489287	12.1686	20.4777	5.9212	3.98453	1	1	-7124128	0.782241	499.118	6.21284	782241	-9.10734	0.944702	-0.714807	0	1.0725	2	0.24009	0.249197
9	2005	MEXIC	32.78	234149	416.59	37.51	54.53	385.77	880000000	8277.67	210000000	220000000	76.31	6.0321	5.95524	9.02132	19.1801	433000000	0.493666	12.3637	20.5926	5.96725	3.99875	1	1	-5792608	0.877476	474.759	6.16281	877476	-6.60144	0.926018	-0.705897	0	1.1217	2	0.243532	0.250134
9	2006	MEXIC	34.2	267603	427.32	39.36	55.33	394.94	980000000	9068.29	250000000	250000000	76.62	6.05753	5.97873	9.11254	19.334	502000000	0.514779	12.4973	20.6984	6.0321	4.01332	1	1	-3585376	0.975387	438.103	6.08245	975387	-3.67585	0.924225	-0.664018	0	1.1116	2	0.255551	0.259227
9	2007	MEXIC	33.84	298341	429.6	44.03	56.16	410.1	1100000000	9642.68	260000000	270000000	76.92	6.06285	6.0164	9.17395	19.384	527000000	0.501012	12.606	20.7746	6.05753	4.0282	1	1	-3318672	1.0527	408.095	6.0115	1052696	-3.15254	0.954609	-0.691125	0	1.0793	2	0.24893	0.252082
9	2008	MEXIC	34.76	250163	432.24	29.17	57.01	398.88	1100000000	10016.6	290000000	300000000	77.22	6.06898	5.98866	9.212	19.4852	594000000	0.534967	12.4299	20.8276	6.06285	4.04323	1	1	-13900000	1.10999	389.409	5.96463	1109989	-12.5392	0.922821	-0.62555	0	1.0544	2	0.261214	0.273753
9	2009	MEXIC	31.89	305832	433.54	46.89	57.85	395.92	900000000	8002.97	230000000	230000000	77.52	6.07198	5.98121	8.98757	19.2467	458000000	0.5092	12.6308	20.618	6.06898	4.05785	1	1	-1452784	0.900045	481.687	6.17729	900045	-1.61412	0.913226	-0.674914	0	0.8109	2	0.253793	0.255407
9	2010	MEXIC	32.36	363791	442.61	47.84	58.69	413.96	1100000000	9271.4	300000000	300000000	77.82	6.09269	6.02577	9.13469	19.5086	592000000	0.560087	12.8043	20.7795	6.07198	4.07227	1	1	1168288	1.0578	418.425	6.0365	1057801	1.10445	0.93527	-0.579664	0	1.1753	2	0.280595	0.279491
9	2011	MEXIC	33.56	383699	465.85	38.28	59.52	428.26	1200000000	10203.4	350000000	340000000	78.11	6.14386	6.05973	9.23048	19.6649	690000000	0.584867	12.8576	20.8892	6.09269	4.08631	1	1	3591168	1.18049	394.624	5.97793	1180490	3.0421	0.919309	-0.536371	0	1.116	2	0.293955	0.290912
9	2012	MEXIC	33.78	458834	473.97	41.26	60.33	433.7	1200000000	10241.7	370000000	360000000	78.41	6.16114	6.07235	9.23423	19.719	727000000	0.604959	13.0364	20.9065	6.14386	4.09983	1	1	5987232	1.20109	394.617	5.97792	1201090	4.98483	0.915037	-0.502595	0	1.0175	2	0.304972	0.299987
9	2013	MEXIC	31.86	489685	472.84	41.49	61.13	451.76	1300000000	10725.2	380000000	370000000	78.7	6.15876	6.11315	9.28035	19.7466	749000000	0.587861	13.1015	20.9658	6.16114	4.113	1	1	3941184	1.27444	371.017	5.91625	1274443	3.09248	0.955418	-0.531265	0	1.0611	2	0.295477	0.292384
9	2014	MEXIC	31.49	491707	459.63	39.62	61.91	430.92	1300000000	10928.9	360000000	370000000	78.99	6.13042	6.06592	9.29917	19.7148	735000000	0.558569	13.1056	20.9974	6.15876	4.12568	1	1	-5161760	1.31535	349.435	5.85632	1315351	-3.92424	0.937537	-0.582377	0	1.0321	2	0.277322	0.281247
9	2015	MEXIC	29.99	501999	463.12	39.93	62.69	442.31	1200000000	9616.65	350000000	370000000	79.29	6.13799	6.09201	9.17125	19.6775	717000000	0.61216	13.1264	20.8819	6.13042	4.1382	1	1	-14600000	1.17187	395.198	5.97939	1171868	-12.4199	0.955066	-0.490762	0	0.8909	2	0.29987	0.31229
9	2016	MEXIC	29.64	473424	468.79	45.71	63.44	445.47	1100000000	8744.52	340000000	360000000	79.58	6.15015	6.09913	9.07618	19.6547	700000000	0.648905	13.0678	20.7988	6.13799	4.1501	1	1	-12800000	1.07849	434.672	6.07459	1078491	-11.9071	0.950255	-0.432469	0	0.9203	2	0.318499	0.330406
9	2017	MEXIC	30.95	490574	476.95	44.8	64.19	445.99	1200000000	9287.85	380000000	390000000	79.87	6.16741	6.1003	9.13646	19.7493	764000000	0.659069	13.1033	20.8708	6.15015	4.16185	1	1	-8630336	1.15891	411.549	6.01993	1158913	-7.44692	0.935087	-0.416927	0	1.0746	2	0.325811	0.333258
9	2018	MEXIC	31.17	511275	466.58	37.64	64.91	448.45	1200000000	9686.51	420000000	430000000	80.16	6.14543	6.1058	9.17849	19.8444	844000000	0.690637	13.1447	20.924	6.16741	4.173	1	1	-13700000	1.22235	381.708	5.94466	1222349	-11.1974	0.961143	-0.370141	0	1.0547	2	0.33972	0.350917
10	1996	SOUAFRI	30.81	24067.5	357.3	0.62	34.82	284.76	150000000	3494.38	21000000	24000000	54.97	5.87858	5.65165	8.15891	16.8558	45300000	0.307193	10.0886	18.8101		3.55019	1	1	-3520048	0.147606	2420.63	7.79178	147606	-23.8475	0.796977	-1.18028	1	0.9495		0.141673	0.16552
10	1997	SOUAFRI	30.14	28635.6	365.15	0.61	35.44	299.09	150000000	3549.58	20000000	26000000	55.45	5.90031	5.70075	8.17458	16.801	45500000	0.298198	10.2624	18.8433	5.87858	3.56784	1	1	-5910842	0.152587	2393.05	7.78033	152587	-38.7374	0.819088	-1.21	1	1.0337	1	0.12973	0.168467
10	1998	SOUAFRI	29.49	29704.2	357.55	0.65	36.01	306.51	140000000	3154.02	17000000	23000000	55.93	5.87927	5.72525	8.05643	16.6494	39900000	0.28961	10.299	18.7411	5.90031	3.5838	1	1	-5877770	0.137775	2595.18	7.86141	137775	-42.6622	0.857251	-1.23922	1	0.9029	1	0.123474	0.166136
10	1999	SOUAFRI	28.54	69127.1	370.11	1.01	36.55	289.95	140000000	3081.57	23000000	22000000	56.41	5.9138	5.66971	8.03319	16.9316	44600000	0.326209	11.1437	18.7328	5.87927	3.59868	1	1	547314	0.136632	2708.8	7.90426	136632	4.00574	0.783416	-1.12022	1	0.9917	1	0.165107	0.161102
10	2000	SOUAFRI	29.07	62207.7	371.65	1.03	37.07	297.06	140000000	3032.43	23000000	24000000	56.89	5.91795	5.69393	8.01712	16.9405	47200000	0.346197	11.0382	18.7308	5.9138	3.61281	1	1	-1688366	0.136361	2725.48	7.9104	136361	-12.3816	0.7993	-1.06075	1	0.998	1	0.166908	0.179289
10	2001	SOUAFRI	29.55	54835.6	376.48	1.17	37.57	282.78	120000000	2666.47	26000000	23000000	57.37	5.93086	5.64467	7.88851	17.0705	49400000	0.406154	10.9121	18.6155	5.91795	3.62621	1	1	2485078	0.121515	3098.23	8.03859	121515	20.4508	0.751116	-0.901023	1	0.8911	1	0.213302	0.192852
10	2002	SOUAFRI	29.69	59328.9	366.56	1.9	38.04	293.76	120000000	2502.28	23000000	24000000	57.9	5.90416	5.68276	7.82496	16.9452	46700000	0.403994	10.9909	18.5646	5.93086	3.63864	1	1	-921610	0.115482	3174.16	8.0628	115482	-7.98053	0.801397	-0.906354	1	0.9504	1	0.198007	0.205987
10	2003	SOUAFRI	28.01	86398.5	399.78	2.02	38.51	319.88	180000000	3751.28	32000000	31000000	58.45	5.99091	5.76795	8.22985	17.2681	62800000	0.358087	11.3667	18.9818	5.90416	3.65092	1	1	409194	0.175257	2281.11	7.73242	175257	2.33482	0.80014	-1.02698	1	1.5176	2	0.180211	0.177876
10	2004	SOUAFRI	27.31	114509	439.15	2.01	38.98	335.76	230000000	4833.63	40000000	44000000	58.99	6.08484	5.8164	8.48335	17.5093	83700000	0.366308	11.6484	19.2474	5.99091	3.66305	1	1	-3342428	0.22859	1921.12	7.56067	228590	-14.6219	0.764568	-1.00428	1	1.3043	2	0.175843	0.190465
10	2005	SOUAFRI	27.14	128189	421.66	2.12	39.47	329.45	260000000	5383.66	47000000	50000000	59.54	6.0442	5.79742	8.59112	17.6636	97100000	0.3768	11.7613	19.3676	6.08484	3.67554	1	1	-3325184	0.257773	1635.78	7.39988	257773	-12.8997	0.781317	-0.976041	1	1.1277	2	0.18195	0.19485
10	2006	SOUAFRI	26.24	139624	430.86	2.38	39.97	330.74	270000000	5602.01	52000000	63000000	60.08	6.06578	5.80133	8.63088	17.7722	115000000	0.425074	11.8467	19.42	6.0442	3.68813	1	1	-10900000	0.271639	1586.15	7.36907	271638	-40.1346	0.767628	-0.855492	1	1.0538	2	0.19247	0.232604
10	2007	SOUAFRI	26.53	167445	441.04	2.94	40.49	355.67	300000000	6095.62	64000000	74000000	60.62	6.08914	5.874	8.71532	17.9703	138000000	0.460178	12.0284	19.5173	6.06578	3.70106	1	1	-10300000	0.299416	1473	7.29506	299416	-34.4411	0.806435	-0.776141	1	1.1023	2	0.212869	0.24731
10	2008	SOUAFRI	28.28	121347	475.96	4.04	41.04	423.21	290000000	5760.81	74000000	82000000	61.15	6.16533	6.04787	8.65883	18.1168	156000000	0.542436	11.7064	19.4742	6.08914	3.71455	1	1	-7967552	0.28677	1659.73	7.41441	286770	-27.7838	0.889171	-0.611685	1	0.9578	2	0.257326	0.28511
10	2009	SOUAFRI	27.58	180778	474.96	3.83	41.61	399.42	300000000	5862.8	54000000	60000000	61.69	6.16323	5.99001	8.67638	17.8008	114000000	0.385393	12.105	19.5057	6.16533	3.72834	1	1	-6445700	0.295936	1604.94	7.38084	295936	-21.7807	0.840955	-0.953492	1	1.032	2	0.181806	0.203587
10	2010	SOUAFRI	27.38	223865	476.67	3.77	42.22	408.88	380000000	7328.62	83000000	78000000	62.22	6.16682	6.01342	8.89954	18.2286	160000000	0.42737	12.3188	19.7434	6.16323	3.74289	1	1	4634512	0.375349	1269.94	7.14672	375349	12.3472	0.857784	-0.850104	1	1.2683	2	0.219859	0.207512
10	2011	SOUAFRI	26.94	203067	467.76	3.67	42.87	394.73	420000000	8007.41	110000000	97000000	62.75	6.14795	5.9782	8.98812	18.4951	204000000	0.491037	12.2213	19.8472	6.16682	3.75817	1	1	11000000	0.416419	1123.29	7.02402	416419	26.3587	0.843873	-0.711236	1	1.1094	2	0.258698	0.232339
10	2012	SOUAFRI	26.68	241934	463.78	3.32	43.55	407.79	400000000	7501.47	99000000	98000000	63.27	6.13941	6.01075	8.92285	18.4076	197000000	0.495939	12.3964	19.7978	6.14795	3.77391	1	1	842616	0.396333	1170.18	7.06491	396333	2.12603	0.879275	-0.701303	1	0.9518	2	0.249032	0.246906
10	2013	SOUAFRI	26.67	231157	464.16	3.31	44.26	420.4	370000000	6832.46	95000000	97000000	63.79	6.14023	6.04121	8.82944	18.3689	192000000	0.523705	12.3508	19.7204	6.13941	3.79008	1	1	-2201696	0.366829	1265.33	7.14309	366829	-6.00196	0.905722	-0.646827	1	0.9256	2	0.258852	0.264854
10	2014	SOUAFRI	26.55	218141	469.11	3.54	44.96	437.37	350000000	6433.19	92000000	93000000	64.31	6.15084	6.08078	8.76923	18.3425	186000000	0.529424	12.2929	19.676	6.14023	3.80577	1	1	-820112	0.350905	1336.86	7.19808	350905	-2.33714	0.93234	-0.635965	1	0.9566	2	0.263544	0.265881
10	2015	SOUAFRI	26.03	219338	451.71	3.97	45.66	427.57	320000000	5734.63	80000000	79000000	64.83	6.11304	6.05812	8.65428	18.198	159000000	0.501502	12.2984	19.5764	6.15084	3.82122	1	1	790128	0.31762	1422.17	7.25994	317620	2.48765	0.946559	-0.690148	1	0.9051	2	0.251995	0.249507
10	2016	SOUAFRI	26.25	237255	470.51	3.99	46.33	414.37	300000000	5272.92	76000000	69000000	65.34	6.15382	6.02676	8.57034	18.1419	145000000	0.488495	12.3769	19.5071	6.11304	3.83579	1	1	6564096	0.296357	1587.64	7.37001	296357	22.1493	0.880683	-0.716426	1	0.9331	2	0.255322	0.233173
10	2017	SOUAFRI	26.29	263505	465.81	4.17	47	421.68	350000000	6132.48	88000000	76000000	65.85	6.14378	6.04425	8.72135	18.2895	164000000	0.469199	12.4818	19.6722	6.15382	3.85015	1	1	11400000	0.349554	1332.58	7.19487	349554	32.6068	0.905262	-0.756728	1	1.1795	2	0.250903	0.218296
10	2018	SOUAFRI	25.85	242643	470.38	4.12	47.64	427.97	370000000	6374.03	93000000	85000000	63.62	6.15354	6.05905	8.75999	18.3522	179000000	0.484862	12.3993	19.7244	6.14378	3.86367	1	1	8194040	0.368289	1277.2	7.15243	368289	22.2489	0.909839	-0.723891	1	1.0536	2	0.253555	0.231306
11	1996	JAPAN	34.5	29939.7	1213.42	6.27	345.01	1151.04	4800000000	38436.9	400000000	340000000	78.15	7.1012	7.04842	10.5568	19.8059	736000000	0.152351	10.3069	22.2989		5.84357	1	1	62800000	4.83371	251.033	5.52558	4833713	12.9836	0.948592	-1.88157	0	0.8871		0.0826675	0.0696839
11	1997	JAPAN	34.11	27079.7	1212.45	6.3	345.84	1147.32	4400000000	35021.7	410000000	330000000	78.27	7.1004	7.04518	10.4637	19.8278	736000000	0.166745	10.2065	22.2082	7.1012	5.84598	1	1	80700000	4.41473	274.637	5.61545	4414733	18.2818	0.946282	-1.79129	0	0.9133	2	0.0925132	0.0742314
11	1998	JAPAN	33.55	26064	1181.48	6.31	346.78	1116.08	4000000000	31902.8	380000000	270000000	78.4	7.07452	7.01758	10.3704	19.7441	648000000	0.160657	10.1683	22.1177	7.1004	5.84869	1	1	103000000	4.03251	292.989	5.68013	4032510	25.6336	0.944646	-1.82848	0	0.9134	2	0.0931455	0.0675119
11	1999	JAPAN	33.04	46115.5	1213.39	7.11	347.41	1155.97	4600000000	36026.6	400000000	300000000	78.52	7.10117	7.05269	10.492	19.8157	703000000	0.154136	10.7389	22.241	7.07452	5.85051	1	1	104000000	4.56208	265.973	5.5834	4562079	22.7609	0.952678	-1.86992	0	1.1313	2	0.0884482	0.0656873
11	2000	JAPAN	32.76	50322	1235.24	6.89	347.99	1170.6	4900000000	38532	460000000	370000000	78.65	7.11902	7.06527	10.5593	19.952	837000000	0.17116	10.8262	22.31	7.10117	5.85217	1	1	88300000	4.88752	252.733	5.53234	4887520	18.0658	0.94767	-1.76516	0	1.0713	2	0.0946129	0.076547
11	2001	JAPAN	31.27	50318.7	1228.47	10.15	348.83	1156.43	4300000000	33846.5	390000000	340000000	79.99	7.11353	7.05309	10.4296	19.7745	731000000	0.169783	10.8261	22.1827	7.11902	5.85459	1	1	43800000	4.30354	285.455	5.65409	4303545	10.173	0.941358	-1.77323	0	0.8805	2	0.089978	0.0798051
11	2002	JAPAN	30.54	78140.1	1233.03	7.9	349.64	1193.06	4100000000	32289.3	400000000	330000000	81.65	7.11723	7.08428	10.3825	19.8062	731000000	0.177718	11.2663	22.1379	7.11353	5.8569	1	1	68000000	4.11512	299.634	5.70256	4115116	16.5329	0.967584	-1.72756	0	0.9562	2	0.0971253	0.0805923
11	2003	JAPAN	30.42	89729.2	1274.47	10.66	350.39	1200.16	4400000000	34808.4	450000000	380000000	83.2	7.15029	7.09021	10.4576	19.9308	830000000	0.186796	11.4046	22.2152	7.11723	5.85905	1	1	75100000	4.44566	286.678	5.65836	4445658	16.8836	0.941693	-1.67774	0	1.0803	2	0.10184	0.0849563
11	2004	JAPAN	30.3	96984.3	1258.68	9.54	350.51	1201.08	4800000000	37688.7	540000000	450000000	84.64	7.13782	7.09098	10.5371	20.111	990000000	0.205673	11.4823	22.295	7.15029	5.85939	1	1	93900000	4.81515	261.4	5.56605	4815149	19.4932	0.954238	-1.58147	0	1.0831	2	0.112583	0.0930899
11	2005	JAPAN	30.2	100901	1299.2	14.24	350.54	1208.09	4800000000	37217.6	570000000	510000000	85.98	7.1695	7.0968	10.5245	20.159	1080000000	0.226397	11.5219	22.2826	7.13782	5.85947	1	1	60900000	4.75541	273.205	5.61022	4755411	12.8131	0.929872	-1.48547	0	0.9876	2	0.119605	0.106792
11	2006	JAPAN	29.98	107636	1275.9	17.29	350.77	1193.08	4500000000	35434	620000000	570000000	87.06	7.15141	7.08429	10.4754	20.2394	1190000000	0.261895	11.5865	22.2341	7.1695	5.86013	1	1	46400000	4.53038	281.632	5.6406	4530377	10.2336	0.935089	-1.33981	0	0.9527	2	0.136064	0.125831
11	2007	JAPAN	29.88	132854	1289.94	23.04	351.17	1229.02	4500000000	35275.2	680000000	610000000	88.01	7.16235	7.11397	10.4709	20.3357	1290000000	0.285844	11.797	22.2307	7.15141	5.86127	1	1	66800000	4.51527	285.684	5.65489	4515265	14.7909	0.952773	-1.25231	0	0.9967	2	0.150317	0.135526
11	2008	JAPAN	29.01	203374	1299.74	10.64	351.34	1137.12	5000000000	39339.3	740000000	750000000	88.91	7.16992	7.03625	10.58	20.4283	1500000000	0.296752	12.2228	22.3403	7.16235	5.86175	1	1	-5944384	5.03791	257.992	5.55293	5037909	-1.17993	0.874883	-1.21486	0	1.1158	2	0.147786	0.148966
11	2009	JAPAN	27.27	200144	1130.02	22.46	351.29	1076.35	5200000000	40855.2	550000000	540000000	89.74	7.02999	6.98133	10.6178	20.119	1090000000	0.208001	12.2068	22.3779	7.16992	5.86161	1	1	4779264	5.23138	216.008	5.37531	5231383	0.913576	0.952505	-1.57021	0	1.0384	2	0.104457	0.103543
11	2010	JAPAN	28.44	214880	1201.84	24.41	351.36	1126.07	5700000000	44507.7	730000000	680000000	90.81	7.09161	7.02649	10.7034	20.4082	1410000000	0.247665	12.2778	22.4638	7.02999	5.86181	1	1	47700000	5.7001	210.845	5.35113	5700098	8.37533	0.936955	-1.39568	0	1.0896	2	0.12802	0.119645
11	2011	JAPAN	26.88	225787	1210.29	16.58	350.71	1177.89	6200000000	48168	780000000	840000000	91.07	7.09861	7.07148	10.7825	20.4796	1630000000	0.264186	12.3273	22.5409	7.09161	5.85996	1	1	-59100000	6.15746	196.557	5.28095	6157460	-9.60308	0.973229	-1.3311	0	1.0802	2	0.127291	0.136894
11	2012	JAPAN	26.75	205752	1296.12	21.99	350.15	1217.23	6200000000	48603.5	760000000	870000000	91.15	7.16713	7.10433	10.7914	20.4529	1640000000	0.263886	12.2344	22.5483	7.09861	5.85836	1	1	-111000000	6.20321	208.943	5.34206	6203214	-17.8488	0.939134	-1.33224	0	1.0074	2	0.123019	0.140867
11	2013	JAPAN	26.94	170710	1282.95	16.04	349.64	1235.06	5200000000	40454.4	680000000	820000000	91.23	7.15692	7.11888	10.6079	20.3366	1500000000	0.291325	12.0477	22.3634	7.16713	5.8569	1	1	-143000000	5.15572	248.84	5.51681	5155717	-27.8091	0.962672	-1.23332	0	0.8311	2	0.131758	0.159567
11	2014	JAPAN	27.69	171663	1249.31	19.67	349.18	1188.63	4900000000	38109.4	650000000	800000000	91.3	7.13035	7.08056	10.5482	20.2992	1460000000	0.300201	12.0533	22.3023	7.15692	5.85559	1	1	-147000000	4.85041	257.568	5.55128	4850414	-30.379	0.951429	-1.2033	0	0.9408	2	0.134911	0.16529
11	2015	JAPAN	29.02	174146	1209.89	18.49	348.81	1141.58	4400000000	34524.5	590000000	610000000	91.38	7.09828	7.04017	10.4494	20.192	1200000000	0.273998	12.0677	22.2025	7.13035	5.85453	1	1	-27000000	4.38948	275.634	5.61907	4389476	-6.15912	0.94354	-1.29463	0	0.905	2	0.13392	0.140079
11	2016	JAPAN	28.98	196614	1193.22	17.36	348.41	1147.13	4900000000	38761.8	610000000	600000000	91.46	7.08441	7.04502	10.5652	20.2236	1200000000	0.244407	12.189	22.3171	7.09828	5.85338	1	1	10400000	4.92254	242.399	5.49059	4922538	2.11225	0.961373	-1.40892	0	1.1214	2	0.123259	0.121147
11	2017	JAPAN	29.16	202441	1187.49	23.16	347.83	1132.44	4900000000	38386.5	650000000	660000000	91.54	7.0796	7.03213	10.5555	20.2987	1310000000	0.270006	12.2182	22.3057	7.08441	5.85171	1	1	-5994176	4.86686	243.995	5.49715	4866864	-1.23163	0.953642	-1.30931	0	0.9887	2	0.134387	0.135619
11	2018	JAPAN	29.07	204780	1164.18	19.09	347.13	1080.72	5000000000	39159.4	690000000	740000000	91.62	7.05977	6.98538	10.5754	20.3559	1430000000	0.288399	12.2297	22.3236	7.0796	5.8497	1	1	-43800000	4.95481	234.96	5.45941	4954807	-8.83644	0.92831	-1.24341	0	1.0181	2	0.139781	0.148618
12	1996	TURKY	30.62	15655.3	175.18	92.84	77.21	168.91	180000000	3053.95	23000000	42000000	62.65	5.16581	5.12937	8.02419	16.9315	64600000	0.356125	9.65857	19.0166		4.34653	1	1	-19500000	0.181476	965.309	6.87245	181476	-107.555	0.964208	-1.03248	0	1.0707		0.124285	0.23184
12	1997	TURKY	30.78	16460.3	184.99	74.65	78.44	176.88	190000000	3144.39	26000000	47000000	63.18	5.2203	5.17547	8.05338	17.0675	72800000	0.383563	9.70871	19.0617	5.16581	4.36233	1	1	-21100000	0.189835	974.48	6.8819	189835	-111.309	0.95616	-0.958251	0	1.0461	1	0.136127	0.247436
12	1998	TURKY	31.04	17400.3	186.86	101.32	79.69	178.03	280000000	4499.74	26000000	44000000	63.7	5.23036	5.18195	8.41178	17.0886	70900000	0.256846	9.76424	19.4358	5.2203	4.37814	1	1	-18100000	0.275967	677.109	6.51783	275967	-65.5678	0.952745	-1.35928	0	1.4537	2	0.095639	0.161207
12	1999	TURKY	28.29	18183.3	187.56	118.83	80.93	176.89	260000000	4116.17	26000000	40000000	64.22	5.2341	5.17553	8.32268	17.0847	66300000	0.258533	9.80826	19.3622	5.23036	4.39358	1	1	-13700000	0.256385	731.554	6.59517	256386	-53.4501	0.943111	-1.35273	0	0.929	2	0.102542	0.155992
12	2000	TURKY	26.8	18812	205.69	115.37	82.17	200.56	270000000	4337.48	27000000	52000000	64.74	5.32637	5.30111	8.37505	17.1175	79200000	0.288868	9.84225	19.4297	5.2341	4.40879	1	1	-24900000	0.274303	749.864	6.61989	274303	-90.7957	0.975059	-1.24179	0	1.0699	2	0.0990362	0.189832
12	2001	TURKY	25.5	20316	186.1	155.43	83.41	182.39	200000000	3142.96	31000000	39000000	65.33	5.22628	5.20615	8.05292	17.2502	69900000	0.34645	9.91916	19.1226	5.32637	4.42377	1	1	-7852886	0.201753	922.413	6.82699	201753	-38.9232	0.980065	-1.06002	0	0.7355	1	0.153763	0.192686
12	2002	TURKY	24.59	18811	196.87	175.36	84.65	192.25	240000000	3687.89	35000000	49000000	65.95	5.28254	5.2588	8.21281	17.3807	84400000	0.351156	9.8422	19.2972	5.22628	4.43853	1	1	-13700000	0.240249	819.442	6.70862	240249	-56.9167	0.976533	-1.04652	0	1.1908	1	0.147119	0.204036
12	2003	TURKY	24.79	33224	208.88	189.65	85.87	202.13	310000000	4760.15	47000000	66000000	66.57	5.34176	5.30891	8.46804	17.6575	113000000	0.357639	10.411	19.5668	5.28254	4.45284	1	1	-19300000	0.314595	663.964	6.49823	314595	-61.2779	0.967685	-1.02823	0	1.3094	2	0.14818	0.209458
12	2004	TURKY	25.11	38591	216.43	189.45	87.07	207.25	410000000	6101.47	62000000	94000000	67.18	5.37727	5.33393	8.71628	17.9506	156000000	0.382323	10.5608	19.8289	5.34176	4.46671	1	1	-31300000	0.408865	529.343	6.27164	408865	-76.6312	0.957584	-0.961488	0	1.2997	2	0.152846	0.229477
12	2005	TURKY	25.24	71322	224.82	186.4	88.23	216.36	510000000	7456.39	73000000	110000000	67.78	5.4153	5.37694	8.91683	18.0991	183000000	0.361507	11.175	20.0427	5.37727	4.47995	1	1	-38000000	0.506315	444.032	6.0959	506315	-75.113	0.96237	-1.01747	0	1.2383	2	0.143197	0.21831
12	2006	TURKY	26.03	95127	247.99	212.33	89.34	239.67	560000000	8102.12	84000000	130000000	68.38	5.51339	5.47926	8.99988	18.2518	215000000	0.385453	11.463	20.1382	5.4153	4.49245	1	1	-45800000	0.557076	445.164	6.09844	557076	-82.22	0.96645	-0.953337	0	1.1002	2	0.151616	0.233836
12	2007	TURKY	26.37	155160	272.77	234.28	90.41	265	680000000	9791.65	110000000	160000000	68.97	5.60863	5.57973	9.18928	18.4801	265000000	0.389323	11.9522	20.3395	5.51339	4.50436	1	1	-53000000	0.681321	400.354	5.99235	681321	-77.8085	0.971514	-0.943345	0	1.2231	2	0.155757	0.233566
12	2008	TURKY	26.15	80462	276.35	239.02	91.5	264.9	770000000	10941	130000000	170000000	69.56	5.62167	5.57935	9.30027	18.6882	298000000	0.387433	11.2955	20.4625	5.60863	4.51634	1	1	-37200000	0.770449	358.687	5.88245	770449	-48.2254	0.958567	-0.948213	0	1.1308	2	0.169604	0.217829
12	2009	TURKY	24.02	143844	275.29	263.42	92.67	256.67	650000000	9103.71	100000000	120000000	70.14	5.61782	5.54779	9.11644	18.4294	223000000	0.342949	11.8765	20.2914	5.62167	4.52904	1	1	-20900000	0.649289	423.987	6.0497	649289	-32.2257	0.932362	-1.07017	0	0.8427	2	0.155362	0.187587
12	2010	TURKY	24.49	187151	276.3	267.89	93.98	265.38	780000000	10742.4	110000000	160000000	70.83	5.62149	5.58116	9.28196	18.5365	273000000	0.351929	12.1397	20.4709	5.61782	4.54308	1	1	-48900000	0.776968	355.613	5.87384	776968	-62.8997	0.960478	-1.04433	0	1.1967	2	0.144515	0.207414
12	2011	TURKY	26.84	137605	298.83	249.24	95.43	284.79	840000000	11420.8	130000000	210000000	71.4	5.69987	5.65175	9.34319	18.7043	338000000	0.403199	11.8321	20.5475	5.62149	4.55839	1	1	-72600000	0.838786	356.265	5.87568	838786	-86.5709	0.953017	-0.908326	0	1.0795	2	0.158314	0.244885
12	2012	TURKY	26.65	192203	314.44	284.37	97	302.67	880000000	11795.3	150000000	200000000	71.97	5.75079	5.71264	9.37546	18.8292	346000000	0.393239	12.1663	20.5961	5.69987	4.57471	1	1	-45400000	0.880556	357.093	5.878	880556	-51.5149	0.962568	-0.933338	0	1.0498	2	0.170862	0.222377
12	2013	TURKY	27.68	152450	303.29	294.15	98.66	283.84	960000000	12614.5	150000000	220000000	72.53	5.71469	5.64841	9.4426	18.8241	365000000	0.380887	11.9346	20.6802	5.75079	4.59168	1	1	-65400000	0.957799	316.653	5.75781	957799	-68.3073	0.93587	-0.965252	0	1.0877	2	0.15629	0.224597
12	2014	TURKY	28.12	183752	335.13	328.25	100.35	307.11	940000000	12157.3	160000000	210000000	73.08	5.81452	5.72721	9.40569	18.8591	362000000	0.385166	12.1213	20.6603	5.71469	4.60866	1	1	-51600000	0.938934	356.926	5.87753	938934	-54.9323	0.916391	-0.954081	0	0.9803	2	0.165117	0.220049
12	2015	TURKY	27.83	158951	340.57	356.42	102.04	317.22	860000000	11006.3	140000000	180000000	73.61	5.83062	5.7596	9.30622	18.7695	324000000	0.374732	11.9764	20.5774	5.81452	4.62537	1	1	-40400000	0.864314	394.035	5.97644	864314	-46.7366	0.931438	-0.981545	0	0.9205	2	0.163998	0.210734
12	2016	TURKY	28.08	149947	358.99	353.85	103.71	338.76	870000000	10895.3	140000000	180000000	74.13	5.8833	5.82529	9.29609	18.762	323000000	0.371345	11.918	20.5836	5.83062	4.6416	1	1	-41600000	0.869683	412.783	6.02292	869683	-47.8101	0.943647	-0.990625	0	1.0062	2	0.161767	0.209577
12	2017	TURKY	29.13	197472	397.11	413.88	105.38	378.63	860000000	10591.5	150000000	210000000	74.64	5.98421	5.93656	9.2678	18.8567	366000000	0.425897	12.1934	20.5713	5.8833	4.65757	1	1	-56500000	0.858989	462.3	6.13621	858989	-65.8251	0.953464	-0.853558	0	0.9877	2	0.180036	0.245861
12	2018	TURKY	29.4	147268	392.07	425.37	106.96	374.13	780000000	9455.59	170000000	200000000	75.14	5.97144	5.9246	9.15436	18.9242	363000000	0.465853	11.9	20.4727	5.98421	4.67246	1	1	-31700000	0.778382	503.699	6.22198	778382	-40.7223	0.954243	-0.763885	0	0.9061	2	0.212565	0.253288
13	1996	ITALY	25.92	74640.1	402.43	5.69	193.33	407.07	1300000000	23081.6	250000000	200000000	66.98	5.99752	6.00899	10.0468	19.3331	451000000	0.343925	11.2204	20.9951		5.2644	1	1	46700000	1.31243	306.63	5.72564	1312427	35.5637	1.01153	-1.06733	0	1.1173		0.189744	0.154181
13	1997	ITALY	25.52	85468.5	407.06	6.88	193.43	410.96	1200000000	21829.3	240000000	200000000	67.04	6.00896	6.0185	9.99101	19.2754	438000000	0.35236	11.3559	20.9399	5.99752	5.26492	1	1	32500000	1.24188	327.777	5.79233	1241880	26.1974	1.00958	-1.0431	0	0.9462	2	0.189279	0.163081
13	1998	ITALY	25.26	108822	420.43	8.57	193.49	421.43	1300000000	22318.1	240000000	210000000	67.1	6.04128	6.04365	10.0131	19.293	449000000	0.353824	11.5975	20.9623	6.00896	5.26523	1	1	29100000	1.27005	331.034	5.80222	1270053	22.9378	1.00238	-1.03896	0	1.0227	2	0.188381	0.165443
13	1999	ITALY	24.68	117334	423.05	9.37	193.52	424.94	1300000000	21997.6	230000000	210000000	67.16	6.04749	6.05195	9.99869	19.2511	441000000	0.352484	11.6728	20.948	6.04128	5.26538	1	1	17500000	1.25202	337.893	5.82273	1252024	14.0162	1.00447	-1.04275	0	0.9858	2	0.18325	0.169234
13	2000	ITALY	24.31	122533	430.78	10.71	193.61	426.04	1100000000	20087.6	240000000	230000000	67.22	6.0656	6.05453	9.90786	19.2833	466000000	0.407216	11.7161	20.8576	6.04749	5.26585	1	1	8096560	1.14383	376.612	5.93121	1143830	7.07847	0.988997	-0.898411	0	0.9136	2	0.207147	0.200069
13	2001	ITALY	24.12	114801	429.46	9.84	193.72	428.83	1200000000	20483.2	240000000	230000000	67.28	6.06253	6.06106	9.92736	19.297	466000000	0.399298	11.6509	20.8777	6.0656	5.26641	1	1	14400000	1.16701	367.999	5.90808	1167013	12.376	0.998533	-0.918048	0	1.0203	2	0.205837	0.193461
13	2002	ITALY	24.03	134743	431.88	10.6	194.01	435	1300000000	22270.1	250000000	240000000	67.38	6.06815	6.07535	10.011	19.3374	486000000	0.382733	11.8111	20.9628	6.06253	5.26791	1	1	13900000	1.27071	339.872	5.82857	1270712	10.9027	1.00722	-0.960417	0	1.0889	2	0.196818	0.185915
13	2003	ITALY	23.48	188164	449.52	11.95	194.85	451.59	1600000000	27465.7	290000000	280000000	67.5	6.10818	6.11278	10.2207	19.4907	572000000	0.363671	12.1451	21.177	6.06815	5.27223	1	1	10600000	1.57415	285.564	5.65447	1574146	6.74168	1.0046	-1.01151	0	1.2388	2	0.185206	0.178465
13	2004	ITALY	23.42	231791	464.92	12.85	196.12	458.54	1800000000	31259.7	340000000	340000000	67.62	6.14187	6.12805	10.3501	19.6557	680000000	0.37685	12.3536	21.3128	6.10818	5.27873	1	1	8171456	1.80323	257.827	5.55229	1803227	4.53157	0.986277	-0.975908	0	1.1455	2	0.190691	0.186159
13	2005	ITALY	23.27	237474	466.38	12.78	197.08	460.81	1900000000	32043.1	360000000	360000000	67.74	6.145	6.13299	10.3748	19.7086	724000000	0.389693	12.3778	21.3425	6.14187	5.28361	1	1	1186112	1.85752	251.076	5.52576	1857524	0.638544	0.988057	-0.942397	0	1.0301	2	0.195166	0.194527
13	2006	ITALY	23.4	312464	463.77	16.04	197.67	454.57	1900000000	33501.7	410000000	410000000	67.86	6.13939	6.11935	10.4193	19.8227	816000000	0.419066	12.6522	21.39	6.145	5.2866	1	1	-3602944	1.94792	238.085	5.47263	1947920	-1.84964	0.980163	-0.869727	0	1.0487	2	0.208608	0.210458
13	2007	ITALY	23.77	376513	455.48	17.04	198.68	447.27	2200000000	37822.7	490000000	480000000	67.97	6.12135	6.10316	10.5407	20.0049	968000000	0.437995	12.8387	21.5164	6.13939	5.2917	1	1	7043328	2.21029	206.072	5.32823	2210293	3.1866	0.981975	-0.825549	0	1.1347	2	0.220591	0.217404
13	2008	ITALY	23.6	327911	442.03	13.67	200	428.84	2400000000	40778.3	530000000	520000000	68.09	6.09138	6.06108	10.6159	20.0823	1040000000	0.435303	12.7005	21.5983	6.12135	5.29832	1	1	9379776	2.39886	184.267	5.21638	2398857	3.9101	0.97016	-0.831713	0	1.0853	2	0.219607	0.215697
13	2009	ITALY	21.88	364427	391.59	16.63	200.91	383.69	2200000000	37079.8	400000000	410000000	68.21	5.97021	5.94984	10.5208	19.7949	802000000	0.365862	12.8061	21.5077	6.09138	5.30286	1	1	-11300000	2.19124	178.707	5.18575	2191242	-5.13995	0.979826	-1.0055	0	0.9135	2	0.180361	0.185501
13	2010	ITALY	21.87	328058	396.42	15.37	201.53	392.01	2100000000	36000.5	440000000	480000000	68.33	5.98247	5.97129	10.4913	19.8971	918000000	0.430208	12.701	21.4813	5.97021	5.30594	1	1	-42700000	2.13402	185.762	5.22447	2134018	-19.9877	0.988875	-0.843486	0	0.9739	2	0.20511	0.225098
13	2011	ITALY	21.75	355127	386.44	15.49	201.87	384.12	2300000000	38599.1	510000000	550000000	68.44	5.95698	5.95096	10.561	20.0545	1060000000	0.464351	12.7802	21.5527	5.98247	5.30762	1	1	-39600000	2.29199	168.605	5.12756	2291991	-17.2915	0.993996	-0.767114	0	1.074	2	0.22353	0.240821
13	2012	ITALY	21.35	375029	369.9	17.97	202.42	366.78	2100000000	35053.5	490000000	480000000	68.68	5.91323	5.90476	10.4646	20.0111	974000000	0.466618	12.8348	21.459	5.95698	5.31034	1	1	7287168	2.08708	177.233	5.17747	2087077	3.49157	0.991565	-0.762243	0	0.9106	2	0.235055	0.231563
13	2013	ITALY	21.17	364959	340.48	17.04	204.78	338.22	2100000000	35550	510000000	470000000	68.98	5.83036	5.8237	10.4787	20.0434	980000000	0.457667	12.8075	21.4847	5.91323	5.32194	1	1	33300000	2.14132	159.005	5.06894	2141315	15.5607	0.993362	-0.781613	0	1.026	2	0.236614	0.221053
13	2014	ITALY	20.8	352502	317.72	16.33	206.67	319.71	2200000000	35518.4	520000000	470000000	69.27	5.76117	5.76741	10.4778	20.0662	986000000	0.456715	12.7728	21.493	5.83036	5.33112	1	1	50600000	2.15913	147.152	4.99146	2159134	23.4341	1.00626	-0.783695	0	1.0083	2	0.240075	0.216641
13	2015	ITALY	20.86	340466	329.75	18.54	206.47	330.75	1800000000	30230.2	450000000	410000000	69.57	5.79833	5.80136	10.3166	19.9203	853000000	0.464877	12.7381	21.3308	5.76117	5.33016	1	1	42500000	1.8359	179.612	5.1908	1835899	23.1559	1.00303	-0.765982	0	0.8503	2	0.244017	0.220861
13	2016	ITALY	21.22	352634	329.95	18.8	206.12	325.67	1900000000	30939.7	450000000	400000000	69.86	5.79894	5.78589	10.3398	19.9306	854000000	0.455055	12.7732	21.3523	5.79833	5.32846	1	1	51700000	1.8758	175.899	5.16991	1875798	27.5443	0.987028	-0.787338	0	1.0217	2	0.2413	0.213755
13	2017	ITALY	21.3	424733	333.43	21.65	205.81	321.48	2000000000	32406.7	500000000	450000000	70.14	5.80943	5.77294	10.3861	20.0247	944000000	0.481215	12.9592	21.3971	5.79894	5.32695	1	1	50500000	1.9618	169.962	5.13557	1961796	25.7516	0.96416	-0.73144	0	1.0433	2	0.253483	0.227732
13	2018	ITALY	21.46	428272	332.08	20.54	202.94	317.14	2100000000	34615.8	540000000	500000000	70.44	5.80538	5.75934	10.4521	20.1055	1040000000	0.495805	12.9675	21.4612	5.80943	5.31291	1	1	41300000	2.09154	158.773	5.06747	2091545	19.7417	0.955011	-0.701572	0	1.0686	2	0.257773	0.238032
14	1996	YINDIA	27.91	8165.81	811.9	2.07	330.41	811.28	390000000	399.95	33000000	37000000	26.82	6.69938	6.69861	5.99134	17.3082	69700000	0.177497	9.00771	19.7891		5.80033	1	1	-3991016	0.392897	2066.45	7.63359	392897	-10.1579	0.999236	-1.7288	1	1.0905		0.0836694	0.0938273
14	1997	YINDIA	27.84	9719.45	854.11	2.28	336.64	853.65	420000000	415.49	34000000	40000000	27.03	6.75006	6.74952	6.02946	17.3442	73700000	0.177164	9.18188	19.8459	6.69938	5.81901	1	1	-5517964	0.415868	2053.8	7.62745	415868	-13.2685	0.999462	-1.73068	1	1.0585	0	0.0819478	0.0952164
14	1998	YINDIA	27.3	13076.9	894.41	3.04	342.89	866.62	420000000	413.3	32000000	40000000	27.24	6.79616	6.7646	6.02417	17.2936	72100000	0.171006	9.4786	19.859	6.75006	5.83741	1	1	-7259224	0.421351	2122.72	7.66045	421352	-17.2284	0.968929	-1.76606	1	1.0132	0	0.0768888	0.0941172
14	1999	YINDIA	26.52	15051.8	911.26	3.26	349.14	931.8	460000000	442	36000000	49000000	27.45	6.81483	6.83712	6.09131	17.402	85000000	0.185324	9.61925	19.9442	6.79616	5.85547	1	1	-12800000	0.45882	1986.09	7.59392	458820	-27.9281	1.02254	-1.68565	1	1.0889	0	0.0786982	0.106626
14	2000	YINDIA	27.33	16339	959.03	3.43	355.37	978.1	470000000	443.31	42000000	52000000	27.67	6.86592	6.88561	6.09427	17.5415	93700000	0.200052	9.70131	19.9648	6.81483	5.87316	1	1	-10700000	0.468395	2047.48	7.62437	468395	-22.8057	1.01988	-1.60918	1	1.0209	0	0.0886232	0.111429
14	2001	YINDIA	26.49	19675.9	967.57	4.01	361.56	994.5	490000000	451.57	43000000	50000000	27.92	6.87479	6.90224	6.11273	17.567	92400000	0.190374	9.88715	20.0006	6.86592	5.89043	1	1	-7247980	0.485441	1993.18	7.59748	485441	-14.9307	1.02783	-1.65876	1	1.0364	0	0.0877217	0.102652
14	2002	YINDIA	27.66	25826.3	1019.03	5.04	367.73	1025.87	510000000	470.99	49000000	57000000	28.24	6.92661	6.9333	6.15484	17.7053	106000000	0.205064	10.1592	20.0596	6.87479	5.90735	1	1	-7789392	0.514938	1978.94	7.59032	514938	-15.1269	1.00671	-1.58443	1	1.0608	1	0.0949688	0.110096
14	2003	YINDIA	27.47	32549.2	1062.19	5.43	373.85	1051.75	610000000	546.73	58000000	72000000	28.57	6.96809	6.95821	6.30396	17.8835	130000000	0.214115	10.3905	20.2252	6.92661	5.92385	1	1	-13200000	0.607699	1747.89	7.46616	607699	-21.7824	0.990171	-1.54124	1	1.1801	1	0.0961662	0.117949
14	2004	YINDIA	29.22	38060.2	1114.38	5.41	379.94	1133.44	710000000	627.77	75000000	98000000	28.9	7.01605	7.03301	6.44217	18.1329	173000000	0.244262	10.5469	20.3796	6.96809	5.94001	1	1	-23200000	0.709148	1571.43	7.35974	709149	-32.7563	1.0171	-1.40951	1	1.1669	1	0.105753	0.138509
14	2005	YINDIA	29.53	43201.6	1203.63	5.25	385.99	1191.1	820000000	714.86	99000000	140000000	29.23	7.0931	7.08263	6.57209	18.4123	239000000	0.290878	10.6736	20.5253	7.01605	5.95581	1	1	-40300000	0.820382	1467.16	7.29108	820382	-49.13	0.98959	-1.23485	1	1.1569	1	0.120874	0.170004
14	2006	YINDIA	30.93	70870.3	1253.7	7.55	392	1283.19	940000000	806.75	120000000	180000000	29.57	7.13385	7.1571	6.69301	18.6019	296000000	0.314616	11.1686	20.6617	7.0931	5.97126	1	1	-56100000	0.94026	1333.36	7.19545	940260	-59.6361	1.02352	-1.1564	1	1.1461	1	0.12749	0.187126
14	2007	YINDIA	30.9	105790	1366.44	8.93	397.96	1404.1	1200000000	1028.33	140000000	220000000	29.91	7.21996	7.24715	6.93569	18.7862	360000000	0.296102	11.5692	20.9194	7.13385	5.98635	1	1	-72000000	1.21673	1123.04	7.02379	1216736	-59.1865	1.02756	-1.21705	1	1.294	1	0.118458	0.177644
14	2008	YINDIA	31.14	125212	1466.56	9.88	403.83	1341.91	1200000000	998.52	180000000	300000000	30.25	7.29068	7.20185	6.90627	19.0024	483000000	0.402913	11.7378	20.9047	7.21996	6.00099	1	1	-125000000	1.1989	1223.26	7.10927	1198896	-104.455	0.915005	-0.909035	1	0.9853	1	0.149229	0.253684
14	2009	YINDIA	31.12	171218	1596.24	13.02	409.57	1512.67	1300000000	1101.96	170000000	260000000	30.59	7.37541	7.32163	7.00485	18.9454	430000000	0.320376	12.0507	21.0173	7.29068	6.01511	1	1	-91900000	1.34189	1189.55	7.08133	1341887	-68.5079	0.947646	-1.13826	1	1.1193	1	0.125934	0.194442
14	2010	YINDIA	30.73	205580	1660.65	12.31	415.14	1596.77	1700000000	1357.56	220000000	340000000	30.93	7.41496	7.37574	7.21344	19.1912	557000000	0.332591	12.2336	21.2395	7.37541	6.02862	1	1	-125000000	1.67562	991.069	6.89878	1675615	-74.6728	0.961533	-1.10084	1	1.2487	1	0.128959	0.203632
14	2011	YINDIA	30.16	206354	1735.15	11.02	420.52	1659.91	1800000000	1458.1	290000000	450000000	31.28	7.45885	7.41452	7.28489	19.4767	738000000	0.404891	12.2373	21.3238	7.41496	6.04149	1	1	-163000000	1.82305	951.784	6.85834	1823051	-89.4906	0.956638	-0.904137	1	1.088	1	0.1577	0.247191
14	2012	YINDIA	29.4	224985	1848.13	12.09	425.73	1780.14	1800000000	1443.88	290000000	480000000	31.63	7.52193	7.48445	7.27509	19.4747	764000000	0.4179	12.3238	21.3263	7.45885	6.0538	1	1	-190000000	1.82764	1011.21	6.9189	1827638	-103.914	0.963211	-0.872513	1	1.0025	1	0.156993	0.260907
14	2013	YINDIA	28.4	226549	1929.35	11.82	430.8	1868.62	1900000000	1449.61	330000000	450000000	32	7.56494	7.53296	7.27905	19.6194	786000000	0.423401	12.3307	21.3421	7.52193	6.06564	1	1	-123000000	1.85672	1039.12	6.94613	1856722	-66.2151	0.968523	-0.859435	1	1.0159	1	0.178593	0.244808
14	2014	YINDIA	27.66	253120	2083.54	12.39	435.76	2019.67	2000000000	1573.88	320000000	450000000	32.38	7.64182	7.61069	7.3613	19.5731	765000000	0.375335	12.4416	21.4358	7.56494	6.07709	1	1	-132000000	2.03913	1021.78	6.9293	2039127	-64.8245	0.969345	-0.979938	1	1.0982	1	0.155255	0.22008
14	2015	YINDIA	27.35	282617	2149.38	13.16	440.66	2066.01	2100000000	1605.61	260000000	380000000	32.78	7.67293	7.63338	7.38126	19.3841	642000000	0.305175	12.5518	21.4669	7.64182	6.08827	1	1	-118000000	2.10359	1021.77	6.92929	2103588	-56.0098	0.961212	-1.18687	1	1.0316	1	0.124583	0.180593
14	2016	YINDIA	26.62	318320	2242.89	13.92	445.48	2076.83	2300000000	1732.56	260000000	350000000	33.18	7.71552	7.6386	7.45735	19.3743	606000000	0.2639	12.6708	21.5539	7.67293	6.09915	1	1	-86600000	2.2948	977.38	6.88488	2294798	-37.7312	0.925962	-1.33218	1	1.0909	1	0.113084	0.150816
14	2017	YINDIA	26.48	377246	2329.82	14.37	450.24	2161.57	2700000000	1981.65	290000000	440000000	33.6	7.75355	7.67859	7.59169	19.4967	733000000	0.276216	12.8407	21.6989	7.71552	6.10978	1	1	-146000000	2.65275	878.264	6.77795	2652755	-55.096	0.927784	-1.28657	1	1.1554	1	0.11056	0.165656
14	2018	YINDIA	26.13	386172	2452.5	13.89	454.94	2307.78	2700000000	2005.86	320000000	610000000	34.03	7.80486	7.74404	7.60383	19.5902	937000000	0.3453	12.864	21.7214	7.75355	6.12017	1	1	-293000000	2.71317	903.926	6.80675	2713165	-107.907	0.940991	-1.06334	1	1.0187	1	0.118696	0.226603
15	1996	INDONIA	43.46	26871.4	206.52	10.1	110.35	231.86	230000000	1137.41	48000000	41000000	37.24	5.3304	5.44613	7.03651	17.6922	89200000	0.392317	10.1988	19.2421		4.70366	1	1	7327820	0.22737	908.301	6.81158	227370	32.2287	1.1227	-0.935685	0	1.1249		0.212273	0.180044
15	1997	INDONIA	44.33	31600.4	231.46	12.52	111.96	251.35	220000000	1063.71	46000000	39000000	38.41	5.44441	5.52685	6.96952	17.6358	84900000	0.393648	10.3609	19.1896	5.3304	4.71814	1	1	6306704	0.215749	1072.82	6.97805	215749	29.2317	1.08593	-0.932298	0	0.9489	1	0.21144	0.182208
15	1998	INDONIA	45.23	31393.4	229.47	28.12	113.56	253.8	95000000	463.95	41000000	26000000	39.59	5.43577	5.53655	6.13978	17.5178	66300000	0.694816	10.3544	18.3741	5.44441	4.73233	1	1	14800000	0.0954456	2404.2	7.78497	95445.6	154.71	1.10603	-0.364108	0	0.4424	0	0.424763	0.270053
15	1999	INDONIA	43.36	29555.4	247.94	18.01	115.16	273.08	140000000	671.1	47000000	22000000	40.79	5.51319	5.60977	6.50892	17.6575	68600000	0.489827	10.294	18.7572	5.43577	4.74632	1	1	24700000	0.140001	1770.98	7.47929	140001	176.104	1.10139	-0.713702	0	1.4668	1	0.332966	0.156862
15	2000	INDONIA	41.97	25060.5	269.26	14.23	116.76	272.84	170000000	780.19	62000000	34000000	42	5.59568	5.60889	6.65954	17.9436	95600000	0.579087	10.129	18.9216	5.51319	4.76012	1	1	28600000	0.165021	1631.67	7.39736	165021	173.049	1.0133	-0.546303	0	1.1787	1	0.376068	0.203019
15	2001	INDONIA	47.89	15203.3	291.2	8.87	118.37	291	160000000	748.26	56000000	31000000	42.78	5.67401	5.67332	6.61775	17.8457	87200000	0.543622	9.62927	18.8935	5.59568	4.77381	1	1	25300000	0.160447	1814.93	7.5038	160447	157.804	0.999313	-0.609501	0	0.9723	1	0.350713	0.192909
15	2002	INDONIA	47.75	7103.24	302.12	3.41	119.98	297.24	200000000	900.18	57000000	31000000	43.57	5.71082	5.69454	6.8026	17.8602	88400000	0.451662	8.86831	19.0919	5.67401	4.78733	1	1	25800000	0.195661	1544.1	7.3422	195661	131.937	0.983847	-0.794822	0	1.2195	1	0.291799	0.159862
15	2003	INDONIA	43.75	10328.2	338.12	4.13	121.61	325.19	230000000	1065.65	61000000	33000000	44.35	5.8234	5.78441	6.97134	17.926	93500000	0.398331	9.24263	19.2741	5.71082	4.80082	1	1	28400000	0.234772	1440.2	7.27254	234772	121.123	0.961759	-0.920472	0	1.1999	1	0.259727	0.138604
15	2004	INDONIA	44.63	15857.9	330.64	5.8	123.26	330.89	260000000	1150.26	72000000	47000000	45.14	5.80103	5.80179	7.04774	18.0853	118000000	0.459507	9.67142	19.3639	5.8234	4.8143	1	1	25000000	0.256837	1287.35	7.16034	256837	97.3187	1.00076	-0.777601	0	1.094	1	0.278413	0.181094
15	2005	INDONIA	46.54	41187	340.15	13.53	124.91	335.71	290000000	1263.29	86000000	58000000	45.94	5.82939	5.81625	7.14147	18.2647	143000000	0.501071	10.6259	19.471	5.80103	4.82759	1	1	27900000	0.285869	1189.88	7.08161	285869	97.5183	0.986947	-0.691007	0	1.113	1	0.299295	0.201776
15	2006	INDONIA	46.94	54534	358.69	14.05	126.59	353.77	360000000	1589.8	100000000	61000000	46.73	5.88246	5.86865	7.37136	18.4277	162000000	0.443659	10.9066	19.7142	5.82939	4.84095	1	1	39700000	0.364571	983.87	6.89149	364570	108.802	0.986283	-0.812698	0	1.2753	1	0.276231	0.167429
15	2007	INDONIA	46.8	79927	387.22	17.37	128.27	367.51	430000000	1860	110000000	74000000	47.53	5.95899	5.90675	7.52833	18.5515	188000000	0.435949	11.2889	19.8844	5.88246	4.85414	1	1	39500000	0.432217	895.893	6.79782	432217	91.4556	0.949099	-0.830229	0	1.1856	1	0.263703	0.172247
15	2008	INDONIA	48.06	72228	376.38	13.3	129.98	354.77	510000000	2166.85	140000000	130000000	48.33	5.9306	5.87147	7.68103	18.7342	266000000	0.521405	11.1876	20.0504	5.95899	4.86738	1	1	7606344	0.510229	737.669	6.6035	510229	14.9077	0.942585	-0.651228	0	1.1805	1	0.268156	0.253249
15	2009	INDONIA	47.65	108796	388.27	18.94	131.72	370.35	540000000	2261.25	120000000	97000000	49.12	5.9617	5.91445	7.72367	18.5721	213000000	0.395039	11.5972	20.1063	5.9306	4.88068	1	1	19500000	0.53958	719.578	6.57866	539580	36.2127	0.953847	-0.928771	0	1.0575	1	0.215626	0.179413
15	2010	INDONIA	42.78	160735	428.02	21.29	133.49	383.2	760000000	3122.36	160000000	130000000	49.91	6.05917	5.94856	8.04635	18.8751	291000000	0.386032	11.9875	20.4424	5.9617	4.89403	1	1	23500000	0.755094	566.843	6.34008	755094	31.183	0.895285	-0.951835	0	1.3994	1	0.208608	0.177425
15	2011	INDONIA	43.91	184804	480.06	20.7	135.31	390.46	890000000	3643.04	200000000	180000000	50.6	6.17391	5.96733	8.20057	19.1289	379000000	0.424033	12.1271	20.6101	6.05917	4.90757	1	1	27400000	0.892969	537.6	6.28712	892969	30.7344	0.813357	-0.857944	0	1.1826	1	0.227384	0.196649
15	2012	INDONIA	43.59	211635	513	23.06	137.15	416.27	920000000	3694.35	190000000	190000000	51.28	6.24028	6.03133	8.21456	19.0627	380000000	0.413486	12.2626	20.6376	6.17391	4.92108	1	1	533216	0.91787	558.903	6.32597	917870	0.580928	0.811442	-0.883131	0	1.0279	1	0.207034	0.206453
15	2013	INDONIA	42.64	230799	532.87	25.29	139	424.61	910000000	3623.91	180000000	190000000	51.96	6.27828	6.05117	8.19531	19.0225	368000000	0.403022	12.3493	20.6317	6.24028	4.93447	1	1	-2664336	0.912524	583.952	6.36982	912524	-2.91974	0.796836	-0.908764	0	0.9942	1	0.200051	0.202971
15	2014	INDONIA	41.93	217487	486.14	24.41	140.83	436.53	890000000	3491.62	180000000	180000000	52.64	6.1865	6.07886	8.15812	18.9862	353000000	0.396534	12.2899	20.6076	6.27828	4.94755	1	1	-1166512	0.890815	545.725	6.30211	890815	-1.30949	0.897951	-0.924994	0	0.9762	1	0.197612	0.198922
15	2015	INDONIA	40.05	222410	497.93	25.84	142.63	441.91	860000000	3331.7	150000000	140000000	53.31	6.21046	6.09111	8.11124	18.8284	293000000	0.339998	12.3123	20.5734	6.1865	4.96025	1	1	7996016	0.860854	578.414	6.36029	860854	9.28847	0.887494	-1.07882	0	0.9664	1	0.174643	0.165355
15	2016	INDONIA	39.31	249859	502	26.81	139.31	454.89	930000000	3562.85	140000000	140000000	53.99	6.2186	6.12006	8.17832	18.7883	280000000	0.300194	12.4286	20.6527	6.21046	4.9367	1	1	9111856	0.931877	538.697	6.28915	931877	9.77796	0.906155	-1.20333	0	1.0825	1	0.154986	0.145208
15	2017	INDONIA	39.38	231492	526.97	22.8	140.96	496.41	1000000000	3837.65	170000000	160000000	54.66	6.26714	6.2074	8.25262	18.9395	325000000	0.31981	12.3523	20.7388	6.2186	4.94848	1	1	11200000	1.01562	518.866	6.25165	1015619	11.0376	0.942008	-1.14003	0	1.0899	2	0.165424	0.154386
15	2018	INDONIA	39.73	225720	580.72	21.66	142.56	542.88	1000000000	3893.85	180000000	190000000	55.32	6.36427	6.29689	8.26715	19.0052	367000000	0.352464	12.327	20.7646	6.26714	4.95976	1	1	-8534416	1.04224	557.184	6.3229	1042240	-8.18853	0.93484	-1.04281	0	1.0262	2	0.172138	0.180326
16	1996	UK	24.93	228643	579.38	16.15	240.43	535.48	1400000000	24332.7	250000000	280000000	78.41	6.36196	6.28316	10.0996	19.3282	526000000	0.371647	12.3399	21.0707		5.48243	1	1	-30400000	1.41536	409.352	6.01457	1415359	-21.4658	0.924229	-0.989812	0	1.055		0.17509	0.196556
16	1997	UK	24.05	252959	559.86	16.23	241.05	514.22	1600000000	26734.6	270000000	300000000	78.47	6.32769	6.24265	10.1937	19.4026	566000000	0.363053	12.441	21.1674	6.36196	5.485	1	1	-32100000	1.55908	359.097	5.88359	1559078	-20.6021	0.91848	-1.01321	0	1.1009	2	0.171226	0.191828
16	1998	UK	23.39	337386	560.75	20.45	241.75	518.97	1700000000	28214.3	260000000	310000000	78.53	6.32927	6.25185	10.2476	19.378	567000000	0.34334	12.729	21.2242	6.32769	5.4879	1	1	-45600000	1.65017	339.813	5.8284	1650172	-27.6581	0.925493	-1.06903	0	1.06	2	0.157841	0.185499
16	1999	UK	23.05	385146	551.22	22.89	242.56	515.94	1700000000	28669.5	260000000	310000000	78.59	6.31213	6.24599	10.2636	19.3608	565000000	0.335659	12.8614	21.2435	6.32927	5.49125	1	1	-52600000	1.6824	327.639	5.79191	1682399	-31.2933	0.935997	-1.09166	0	1.0185	2	0.152183	0.183476
16	2000	UK	23.15	463134	566.36	26.51	243.43	524.29	1700000000	28149.9	270000000	350000000	78.65	6.33923	6.26204	10.2453	19.4204	620000000	0.373979	13.0458	21.2288	6.31213	5.49483	1	1	-76500000	1.65782	341.63	5.83373	1657817	-46.1439	0.925719	-0.983556	0	0.9857	2	0.163917	0.210061
16	2001	UK	22.06	527180	577.43	29.24	244.37	536.92	1600000000	27744.5	260000000	330000000	78.75	6.35859	6.28585	10.2308	19.3666	588000000	0.358215	13.1753	21.2181	6.33923	5.49868	1	1	-72500000	1.64025	352.039	5.86374	1640246	-44.2105	0.929844	-1.02662	0	0.9882	2	0.157002	0.201212
16	2002	UK	21.72	548954	557.89	27.55	245.4	522.09	1800000000	30056.6	270000000	350000000	79.05	6.32416	6.25784	10.3108	19.4135	623000000	0.349021	13.2158	21.3024	6.35859	5.50289	1	1	-83000000	1.78447	312.636	5.74504	1784474	-46.5295	0.93583	-1.05262	0	1.0863	2	0.151246	0.197775
16	2003	UK	21.06	634534	567.89	27.79	246.55	534.33	2100000000	34419.1	290000000	400000000	79.34	6.34193	6.28101	10.4464	19.5008	698000000	0.340067	13.3606	21.4426	6.32416	5.50756	1	1	-109000000	2.05302	276.612	5.62262	2053019	-53.1821	0.940904	-1.07861	0	1.1521	2	0.143443	0.196625
16	2004	UK	20.26	740368	573.43	27.3	247.96	534.99	2400000000	40290.3	330000000	480000000	79.63	6.35164	6.28225	10.6039	19.6277	815000000	0.336999	13.5149	21.6058	6.34193	5.51327	1	1	-146000000	2.41693	237.255	5.46914	2416932	-60.3163	0.932965	-1.08767	0	1.1761	2	0.138341	0.198658
16	2005	UK	20.21	851013	579.36	31.05	249.66	532.94	2500000000	42030.3	370000000	500000000	79.92	6.36192	6.27841	10.6462	19.7216	871000000	0.343232	13.6542	21.6549	6.35164	5.5201	1	1	-137000000	2.53868	228.213	5.43028	2538680	-53.8899	0.919877	-1.06935	0	1.0501	2	0.144671	0.198561
16	2006	UK	20.21	1100000	581.93	38.15	251.51	534.68	2700000000	44599.7	440000000	580000000	80.2	6.36635	6.28167	10.7055	19.8917	1010000000	0.372935	13.9407	21.7216	6.36192	5.52748	1	1	-141000000	2.71375	214.438	5.36802	2713750	-52.0838	0.918805	-0.986352	0	1.0684	2	0.160425	0.212509
16	2007	UK	19.68	1100000	570.54	36.27	253.47	522.8	3100000000	50566.8	420000000	640000000	80.48	6.34658	6.2592	10.831	19.8669	1060000000	0.342917	13.9228	21.8549	6.36635	5.53524	1	1	-214000000	3.10088	183.993	5.2149	3100882	-69.0005	0.916325	-1.07027	0	1.1432	2	0.136959	0.205959
16	2008	UK	20.04	901515	560.92	31.17	255.47	508.05	2900000000	47287	440000000	650000000	80.76	6.32958	6.23058	10.764	19.9059	1090000000	0.374566	13.7118	21.7958	6.34658	5.5431	1	1	-212000000	2.92267	191.921	5.25708	2922667	-72.3921	0.905744	-0.981988	0	0.9444	2	0.151087	0.223479
16	2009	UK	18.74	1000000	513.51	42.57	257.41	458.91	2400000000	38713.1	320000000	440000000	81.03	6.24127	6.12885	10.5639	19.572	761000000	0.315663	13.8312	21.6033	6.32958	5.55067	1	1	-129000000	2.41091	212.994	5.36127	2410910	-53.3382	0.893673	-1.15308	0	0.8258	2	0.131162	0.184501
16	2010	UK	18.87	1100000	530.08	43.15	259.44	476.62	2500000000	39435.8	390000000	570000000	81.3	6.27303	6.16672	10.5824	19.7736	954000000	0.385521	13.8711	21.6296	6.24127	5.55853	1	1	-181000000	2.47524	214.153	5.36669	2475244	-72.9231	0.899147	-0.953159	0	1.0287	2	0.156299	0.229222
16	2011	UK	18.66	1200000	495.59	43.53	261.48	438.73	2700000000	42038.6	450000000	660000000	81.57	6.20575	6.08388	10.6463	19.9277	1110000000	0.416256	13.9618	21.7013	6.27303	5.56636	1	1	-204000000	2.65931	186.36	5.22768	2659310	-76.8145	0.885268	-0.876456	0	1.0719	2	0.16972	0.246535
16	2012	UK	18.63	1400000	512.09	53.26	263.3	461.51	2700000000	42462.8	440000000	610000000	81.84	6.2385	6.1345	10.6564	19.9006	1050000000	0.389147	14.1805	21.7183	6.20575	5.57329	1	1	-174000000	2.70489	189.32	5.24344	2704888	-64.3522	0.901228	-0.943799	0	1.0166	2	0.162397	0.226749
16	2013	UK	18.82	1500000	500.03	54.29	265.07	448.71	2800000000	43444.5	520000000	630000000	82.1	6.21467	6.10638	10.6792	20.0629	1150000000	0.412028	14.2293	21.7479	6.2385	5.57999	1	1	-115000000	2.78602	179.478	5.19005	2786023	-41.1337	0.897366	-0.886664	0	1.0293	2	0.185447	0.226581
16	2014	UK	18.36	1600000	458.08	51.62	267.03	407.84	3100000000	47425.6	500000000	680000000	82.37	6.12704	6.01088	10.7669	20.0253	1180000000	0.385936	14.2739	21.8429	6.21467	5.58736	1	1	-187000000	3.0638	149.513	5.00739	3063804	-61.1261	0.890325	-0.952084	0	1.1014	2	0.162405	0.223531
16	2015	UK	18.14	1500000	439.73	52.27	269.15	389.75	2900000000	44974.8	450000000	620000000	82.63	6.08616	5.96551	10.7139	19.9308	1070000000	0.366695	14.2412	21.7978	6.12704	5.59527	1	1	-168000000	2.92859	150.151	5.01164	2928591	-57.5175	0.886339	-1.00322	0	0.9567	2	0.154589	0.212106
16	2016	UK	17.58	1500000	415.79	54.21	271.2	371.14	2700000000	41064.1	400000000	630000000	82.89	6.03018	5.91658	10.6229	19.8055	1030000000	0.380448	14.1944	21.7144	6.08616	5.60286	1	1	-226000000	2.69428	154.323	5.03905	2694283	-83.9621	0.892614	-0.966406	0	0.9183	2	0.148243	0.232205
16	2017	UK	17.56	1800000	404.12	67.73	273.05	358.73	2700000000	40361.4	430000000	630000000	83.14	6.00171	5.88257	10.6056	19.8699	1050000000	0.395054	14.4065	21.7039	6.03018	5.60966	1	1	-201000000	2.66623	151.57	5.02105	2666229	-75.5136	0.887682	-0.928733	0	0.9886	2	0.15977	0.235284
16	2018	UK	17.52	1900000	396.89	67.61	274.71	352.36	2900000000	43043.2	470000000	660000000	83.4	5.98366	5.86465	10.67	19.9669	1130000000	0.393924	14.4733	21.7743	6.00171	5.61572	1	1	-188000000	2.86067	138.74	4.9326	2860668	-65.7631	0.887803	-0.931596	0	1.0732	2	0.164081	0.229844
17	1996	CHINA	47.1	128069	3177.72	14.83	129.19	3090.56	860000000	709.41	150000000	140000000	31.92	8.06392	8.03611	6.56443	18.8261	286000000	0.330681	11.7603	20.5768		4.86128	1	1	14400000	0.863747	3678.99	8.2104	863747	16.6272	0.972572	-1.1066	1	1.17589		0.173654	0.157027
17	1997	CHINA	47.1	153995	3166.8	16.01	130.52	3062.75	960000000	781.74	180000000	140000000	32.88	8.06048	8.02707	6.66152	19.0153	319000000	0.331646	11.9447	20.6841	8.06392	4.87153	1	1	43500000	0.961604	3293.25	8.09963	961604	45.2869	0.967144	-1.10369	1	1.11329	1	0.188466	0.143179
17	1998	CHINA	45.8	175156	3163.37	17.02	131.77	3139.1	1000000000	828.58	180000000	140000000	33.87	8.05939	8.05169	6.71971	19.0254	321000000	0.311762	12.0734	20.7519	8.06048	4.88106	1	1	45300000	1.02904	3074.09	8.03076	1029043	44.0408	0.992328	-1.16552	1	1.07013	1	0.177901	0.13386
17	1999	CHINA	45.36	186189	3294.43	17.02	132.92	3039.99	1100000000	873.29	190000000	160000000	34.86	8.09999	8.01961	6.77227	19.0816	355000000	0.324645	12.1345	20.8131	8.05939	4.88975	1	1	32200000	1.094	3011.37	8.01015	1093997	29.3922	0.922767	-1.12502	1	1.06312	1	0.177018	0.147626
17	2000	CHINA	45.54	193348	3360.87	15.96	133.97	3310.07	1200000000	959.37	250000000	220000000	35.88	8.11995	8.10473	6.86628	19.3317	472000000	0.389543	12.1723	20.915	8.09999	4.89762	1	1	25500000	1.21135	2774.49	7.92822	1211347	21.0482	0.984885	-0.94278	1	1.10727	1	0.205296	0.184248
17	2001	CHINA	44.79	203142	3523.08	15.17	134.95	3396.15	1300000000	1053.11	270000000	240000000	37.09	8.16709	8.1304	6.9595	19.3972	507000000	0.378696	12.2217	21.0155	8.11995	4.9049	1	1	23800000	1.3394	2630.35	7.87487	1339396	17.7799	0.963972	-0.971021	1	1.10571	1	0.198238	0.180458
17	2002	CHINA	44.45	216503	3843.4	14.72	135.86	3605.39	1500000000	1148.51	320000000	290000000	38.43	8.25411	8.19019	7.04622	19.5992	618000000	0.420503	12.2854	21.1089	8.16709	4.91162	1	1	31500000	1.47055	2613.58	7.86848	1470550	21.4334	0.938073	-0.866305	1	1.09792	1	0.220968	0.199535
17	2003	CHINA	45.62	228371	4532.15	13.75	136.7	4176.63	1700000000	1288.64	440000000	410000000	39.78	8.41895	8.33726	7.16134	19.896	849000000	0.511078	12.3387	21.2303	8.25411	4.91779	1	1	26000000	1.66029	2729.74	7.91196	1660288	15.6547	0.921556	-0.671233	1	1.12903	1	0.263366	0.247712
17	2004	CHINA	45.9	245467	5334.89	12.55	137.52	4837.28	2000000000	1508.67	590000000	560000000	41.14	8.58202	8.48411	7.31898	20.1994	1150000000	0.58897	12.4109	21.3938	8.41895	4.92377	1	1	32800000	1.95535	2728.36	7.91146	1955347	16.7636	0.906725	-0.52938	1	1.17772	1	0.302867	0.286103
17	2005	CHINA	47.02	272094	6098.18	11.9	138.33	5403.09	2300000000	1753.42	760000000	660000000	42.52	8.71575	8.59473	7.46932	20.4493	1420000000	0.620292	12.5139	21.55	8.58202	4.92964	1	1	103000000	2.28597	2667.66	7.88896	2285966	44.9279	0.886017	-0.477566	1	1.16908	1	0.33261	0.287682
17	2006	CHINA	47.56	292559	6677.29	10.63	139.1	5913.49	2800000000	2099.23	970000000	790000000	43.87	8.80647	8.68499	7.64933	20.6893	1760000000	0.637953	12.5864	21.7356	8.71575	4.93519	1	1	177000000	2.75213	2426.22	7.79409	2752132	64.487	0.885612	-0.44949	1	1.20393	1	0.35122	0.286733
17	2007	CHINA	46.88	327087	7239.76	9.21	139.83	6316.44	3600000000	2693.97	1200000000	950000000	45.2	8.88734	8.75091	7.89877	20.9204	2170000000	0.6116	12.698	21.9903	8.80647	4.94043	1	1	264000000	3.55034	2039.17	7.6203	3550343	74.4643	0.872465	-0.491677	1	1.29003	1	0.343032	0.268568
17	2008	CHINA	46.97	378083	7378.25	8.23	140.55	6337.93	4600000000	3468.3	1400000000	1100000000	46.54	8.90629	8.75431	8.15142	21.0802	2560000000	0.556545	12.8429	22.2481	8.88734	4.94556	1	1	301000000	4.59431	1605.95	7.38147	4594307	65.5224	0.859002	-0.586007	1	1.29405	1	0.311034	0.245511
17	2009	CHINA	45.96	473083	7710.06	9.25	141.25	6618.25	5100000000	3832.24	1200000000	1000000000	47.88	8.95028	8.79759	8.2512	20.9056	2200000000	0.431628	13.067	22.3528	8.90629	4.95053	1	1	198000000	5.1017	1511.27	7.32071	5101703	38.809	0.858391	-0.840191	1	1.11044	2	0.235219	0.196409
17	2010	CHINA	46.5	587817	8143.44	9.64	141.94	7095.26	6100000000	4550.45	1600000000	1400000000	49.23	9.00497	8.86718	8.42298	21.1783	2950000000	0.485219	13.2842	22.5295	8.95028	4.9554	1	1	199000000	6.08716	1337.81	7.19879	6087164	32.6837	0.871285	-0.723155	1	1.19316	2	0.258951	0.226268
17	2011	CHINA	46.53	711802	8824.31	9.41	142.62	8420.06	7600000000	5618.13	1900000000	1700000000	50.57	9.08527	9.03837	8.63375	21.363	3590000000	0.47533	13.4756	22.745	9.00497	4.96018	1	1	203000000	7.5515	1168.55	7.06352	7551500	26.8276	0.954189	-0.743745	1	1.24056	2	0.251079	0.224251
17	2012	CHINA	45.42	831940	9001.26	9.75	143.31	8519.18	8500000000	6316.92	2000000000	1700000000	51.77	9.10512	9.05008	8.75099	21.4398	3800000000	0.444995	13.6315	22.8671	9.08527	4.96501	1	1	298000000	8.53223	1054.97	6.96127	8532230	34.9189	0.946443	-0.809693	1	1.12987	2	0.239957	0.205038
17	2013	CHINA	44.18	955851	9244	9.99	144.02	8977.1	9600000000	7050.65	2200000000	1800000000	53.01	9.13173	9.10243	8.86088	21.515	4050000000	0.423445	13.7704	22.9819	9.10512	4.96995	1	1	362000000	9.57041	965.894	6.87305	9570406	37.8273	0.971127	-0.859333	1	1.12168	2	0.230636	0.192809
17	2014	CHINA	43.09	1100000	9239.86	10.39	144.75	9086.96	10000000000	7678.6	2300000000	1900000000	54.26	9.13128	9.11459	8.94619	21.5734	4220000000	0.402503	13.8965	23.0723	9.13173	4.97501	1	1	464000000	10.4757	882.029	6.78223	10500000	44.2506	0.983452	-0.910052	1	1.09459	2	0.223377	0.179126
17	2015	CHINA	40.84	1200000	9185.99	11.07	145.49	9040.74	11000000000	8066.94	2300000000	1700000000	55.5	9.12543	9.1095	8.99553	21.5444	3950000000	0.356676	14.0143	23.1267	9.13128	4.98011	1	1	601000000	11.0616	830.443	6.72196	11100000	54.2901	0.984188	-1.03093	1	1.05593	2	0.205483	0.151193
17	2016	CHINA	39.58	1400000	9137.63	12.15	146.28	9056.8	11000000000	8147.94	2100000000	1600000000	56.74	9.12016	9.11127	9.00552	21.4619	3670000000	0.326538	14.1183	23.1422	9.12543	4.98552	1	1	518000000	11.2333	813.443	6.70128	11200000	46.1192	0.991154	-1.11921	1	1.01552	2	0.186329	0.140209
17	2017	CHINA	39.85	1500000	9297.99	12.27	147.1	9257.93	12000000000	8879.44	2300000000	1800000000	57.96	9.13755	9.13324	9.09149	21.5378	4090000000	0.33196	14.2143	23.2337	9.12016	4.99111	1	1	430000000	12.3104	755.295	6.62711	12300000	34.8979	0.995691	-1.10274	1	1.09589	2	0.183429	0.148531
17	2018	CHINA	39.69	1600000	9507.11	11.97	147.77	9528.21	14000000000	9976.68	2500000000	2100000000	59.15	9.1598	9.16201	9.20801	21.635	4590000000	0.330575	14.303	23.3548	9.13755	4.99566	1	1	384000000	13.8948	684.22	6.52828	13900000	27.6522	1.00222	-1.10692	1	1.1287	2	0.179114	0.151462
